# Supplementary material for: Combinatorial metabolic engineering using an orthogonal tri-functional CRISPR system
Source: PubMed Central journal article supplement (PMC5700065; doi:10.1038/s41467-017-01695-x), 2017-11-22
Supplement: 41467_2017_1695_MOESM1_ESM.pdf [file 41467_2017_1695_MOESM1_ESM.pdf]

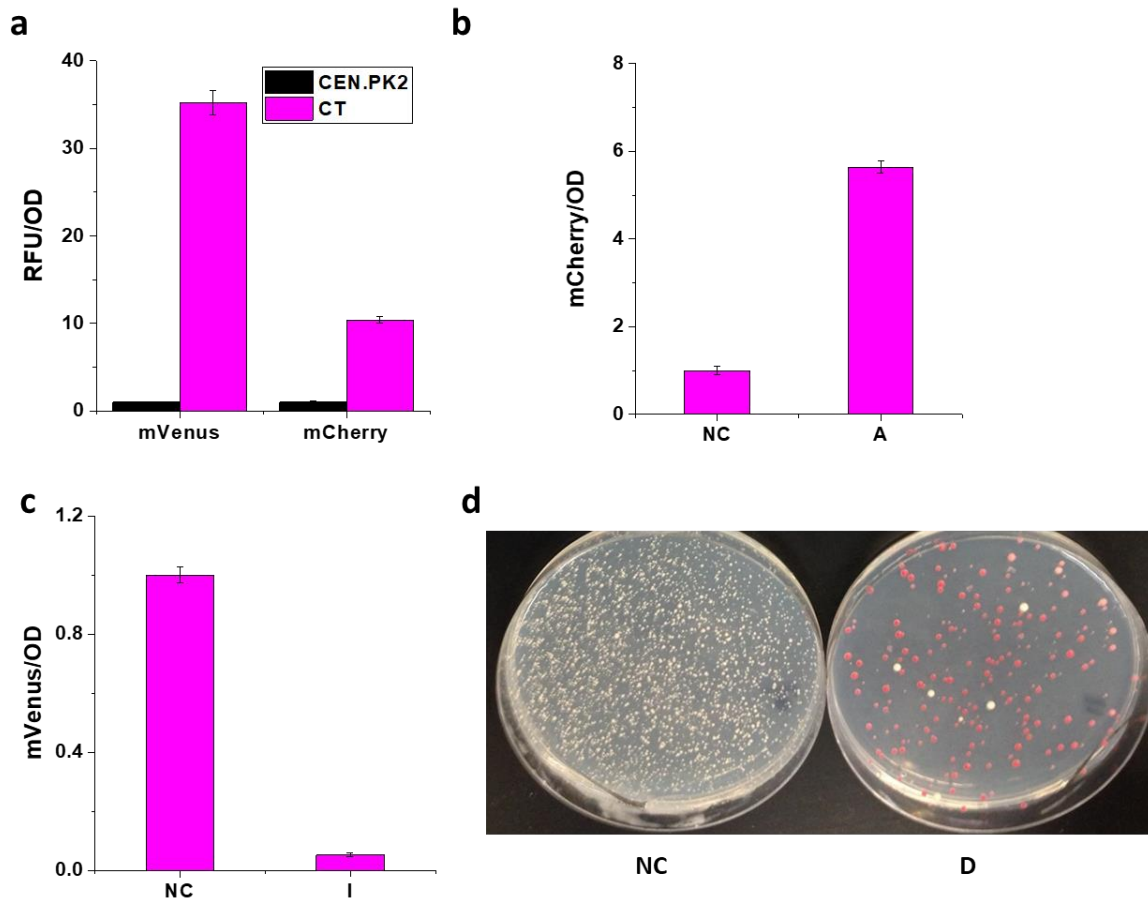

**Supplementary Figure 1 | Construction of a reporter strain for CRISPR-AID.** (a) Fluorescence intensities of mVenus and mCherry of the reporter strain. Strain CT was constructed by integrating *CYC1p-mCherry-TEF1t* and *TEF1p-mVenus-PGK1t* into the *ura3* locus of the CEN.PK2 genome. (b) Strain CT for CRISPRa, with dSpCad9-VPR (Sg6) for the activation of *CYC1p* included as a positive control. The expression level of *mCherry* was increased more than 5-fold. (c) Strain CT for CRISPRi, with dSpCad9-MXI1 (Sg1) for the interference of *TEF1p* included as a positive control. The expression level of *mVenus* was decreased around 10-fold. (d) Strain CT for CRISPRd, with SpCas9 (Sg11) for the deletion of *ADE2* gene included as a positive control. The deletion of *ADE2*, shown as red colonies, was achieved with an efficiency of nearly 100%. Notably, CRISPRa (b), CRISPRi (c), and CRISPRd (d) were carried out individually. Error bars represent the mean  $\pm$  s.d. of biological quadruplicates.

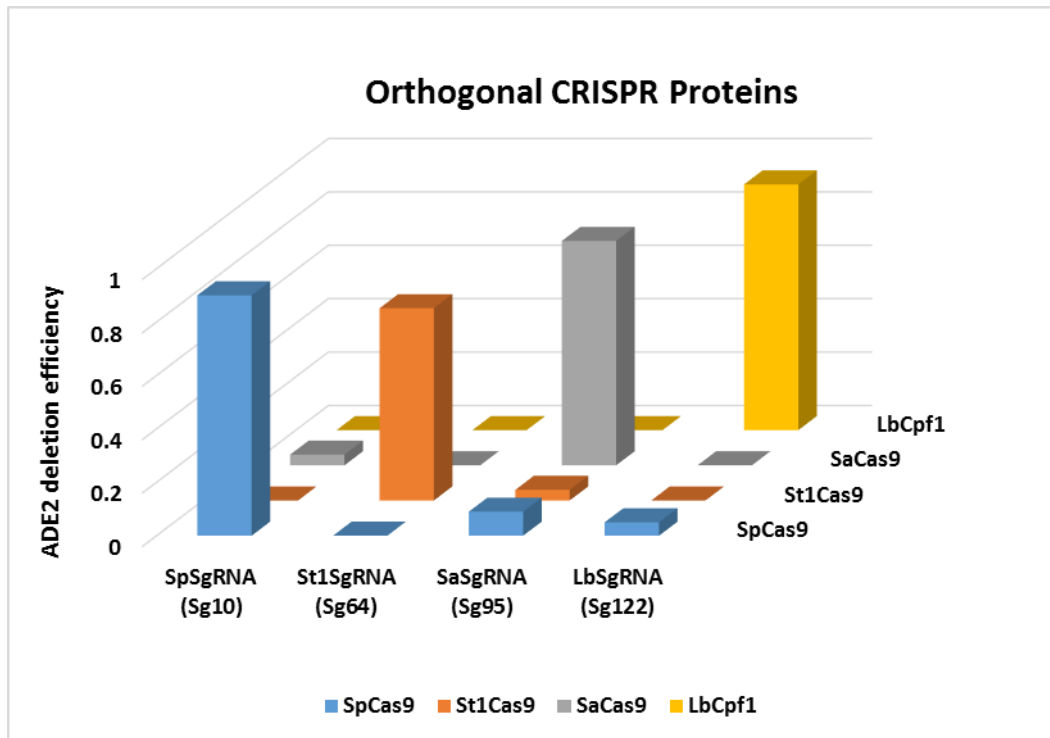

**Supplementary Figure 2 | Orthogonal CRISPR proteins for CRISPR-AID.** The orthogonality was tested by co-transforming the CRISPR proteins (SpCas9, St1Cas9, SaCas9, and LbCpf1) and gRNAs (Sg10, Sg64, Sg95, and Sg122) with different origins and evaluating *ADE2* deletion efficiency. In all cases, 500 ng linear donor DNA that resulted in the deletion of the whole *ADE2* coding sequences was co-transformed as well. The CRISPR proteins were only functional when their cognate gRNAs were present. 1-2 red colonies might be found on selective agar plates, but not in a reproducible manner, probably due to the spontaneous homologous recombination between the genome and the linear donor.

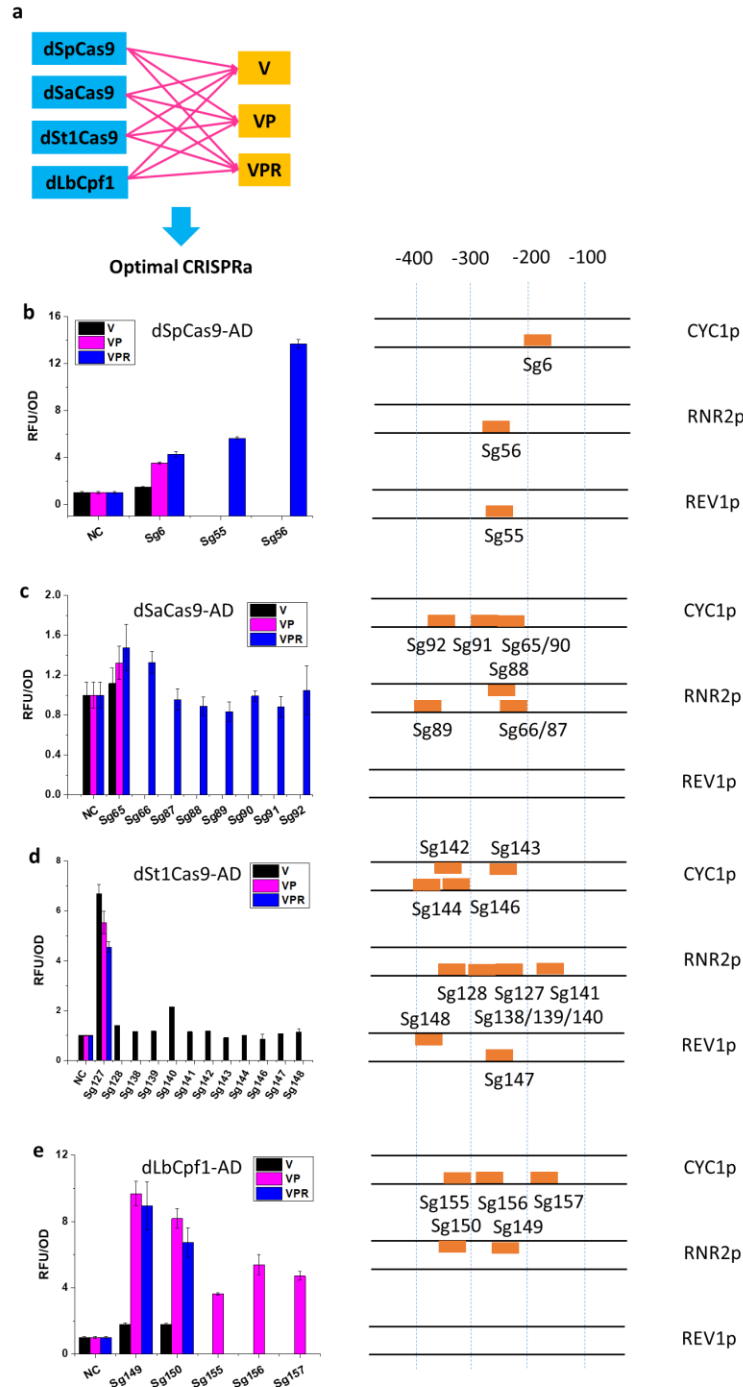

**Supplementary Figure 3 | Optimization of CRISPRa.** By testing all the combinations (a) of 4 nuclease-deficient CRISPR proteins, including dSpCas9 (b), dSaCas9 (c), dSt1Cas9 (d), and dLbCpf1 (e), and 3 activation domains (V, VP, and VPR) with different levels of strength, dSpCas9-VPR and dLbCpf1-VP were found to be the optimal combinations with the strongest activation and highest degree of flexibility in gRNA design. Error bars represent the mean  $\pm$  s.d. of biological quadruplicates.

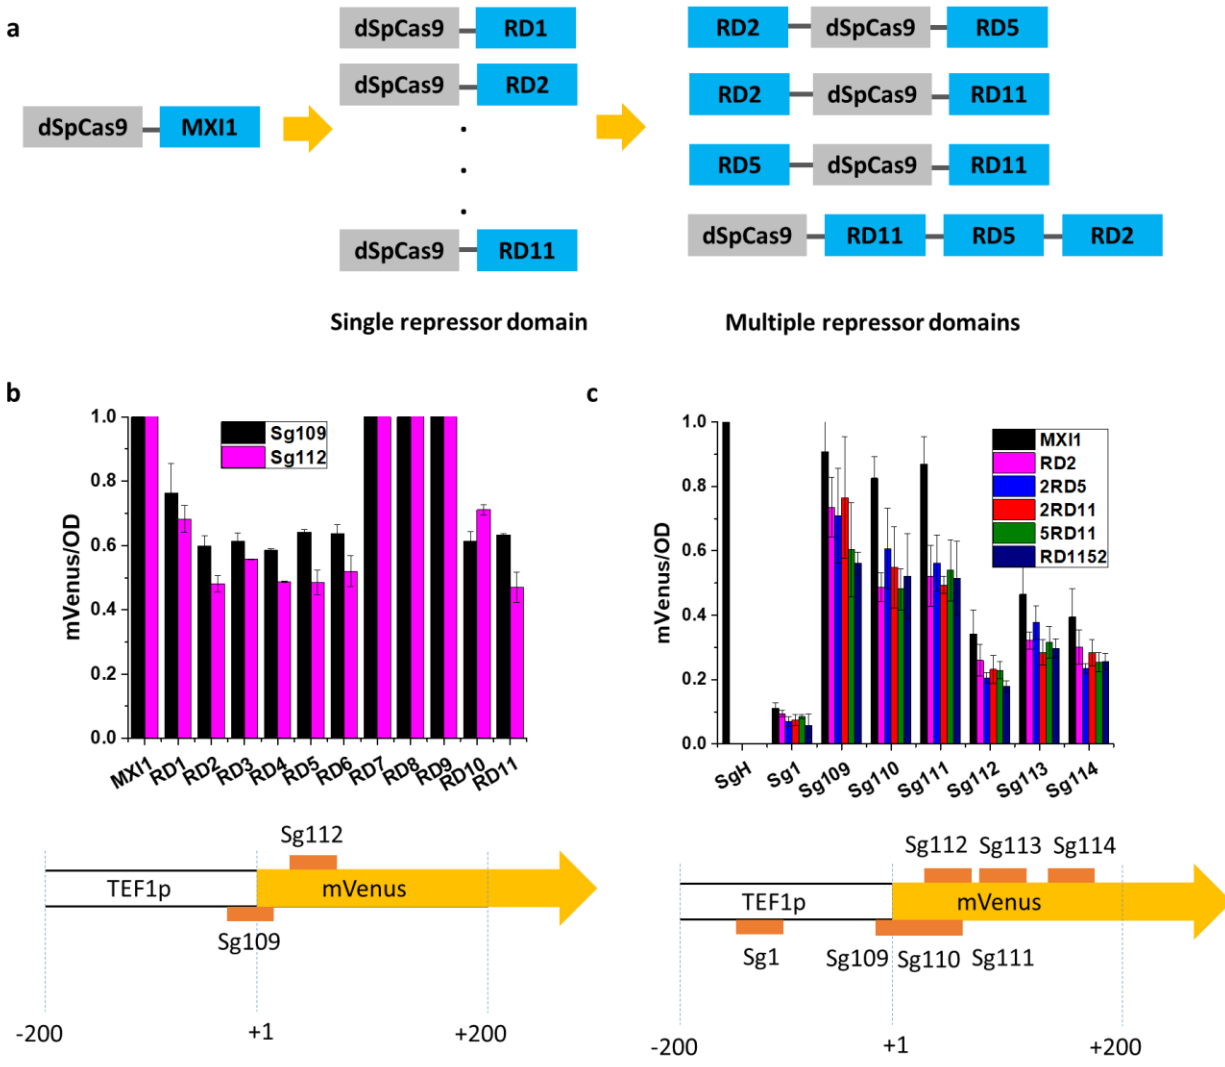

**Supplementary Figure 4 | Optimization of CRISPRi by repression domain engineering.** (a) Workflow of repression domain engineering for optimal CRISPRi. Endogenous repression domains (RD1, RD2, RD3, RD4, RD5, RD6, RD7, RD8, RD9, RD10, and RD11) were tested individually for CRISPRi efficiency and then multiple repression domains were combined either in the form of N- and C-terminal tagged (2RD5, 2RD11, and 5RD11) or tandem repeat at the C-terminus (RD1152) for maximal CRISPRi efficiency. (b) Enhanced CRISPRi efficiency using endogenous repression domains. The MXI1 repression domain was replaced with 11 well-characterized repression domains from *S. cerevisiae*. CRISPRi efficiency was quantified by normalizing the mVenus fluorescence intensities to those of dSpCas9-MXI1. (c) Further enhanced CRISPRi efficiency using multiple repression domains. The mVenus fluorescence intensities were normalized to those without gRNA targeting sequences (SgH). Error bars represent the mean ± s.d. of biological quadruplicates.

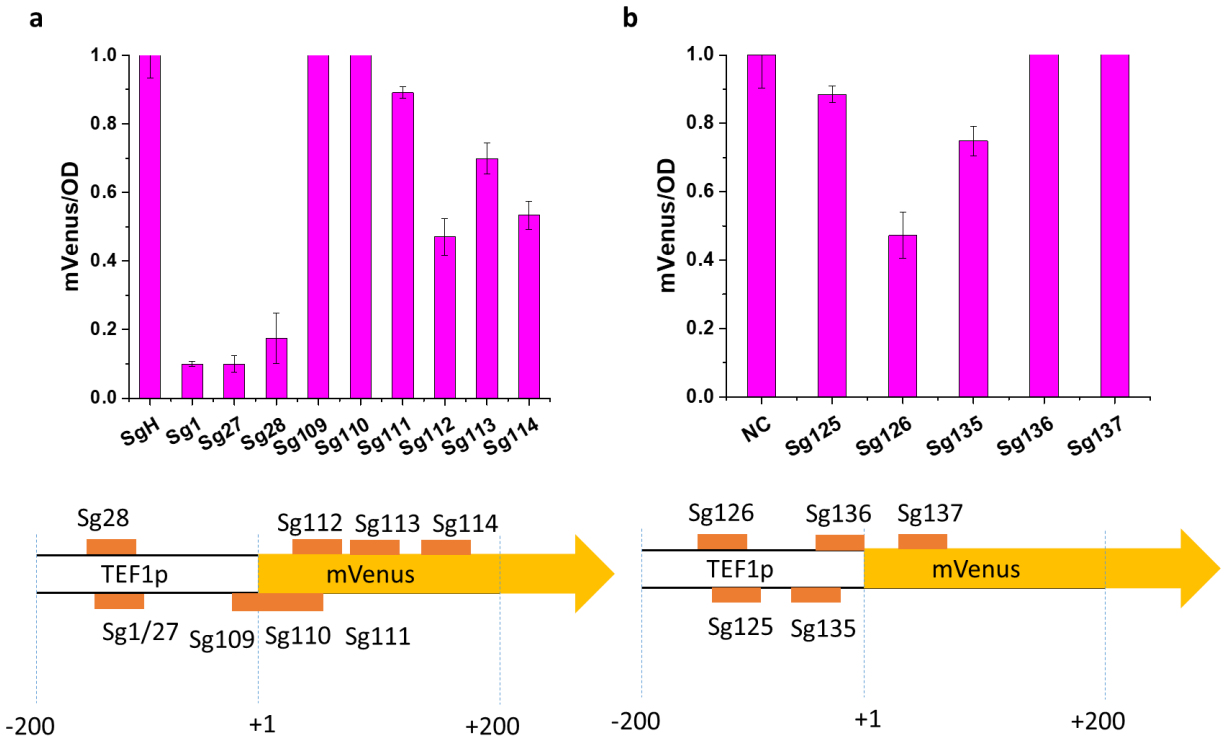

**Supplementary Figure 5 | Selection of appropriate nuclease-deficient CRISPR protein for CRISPRi.** The CRISPRi efficiency using dSpCas9-MXI1 (a) and dLbCpf1-MXI1 (b) were systematically compared, with several gRNAs targeting both the promoter region (blocking transcriptional initiation; Sg1, Sg27 and Sg28 for dSpCas9-MXI1; Sg125 and Sg126 for dLbCpf1-MXI1) and coding region (blocking transcriptional elongation; Sg109, Sg110, Sg111, Sg112, Sg113, and Sg114 for dSpCas9-MXI1; Sg135, Sg136, and Sg137 for dLbCpf1-MXI1) included for analysis. Generally, more efficient CRISPRi was achieved when using dSpCas9-MXI1 and targeting the promoter region. Error bars represent the mean  $\pm$  s.d. of biological quadruplicates.

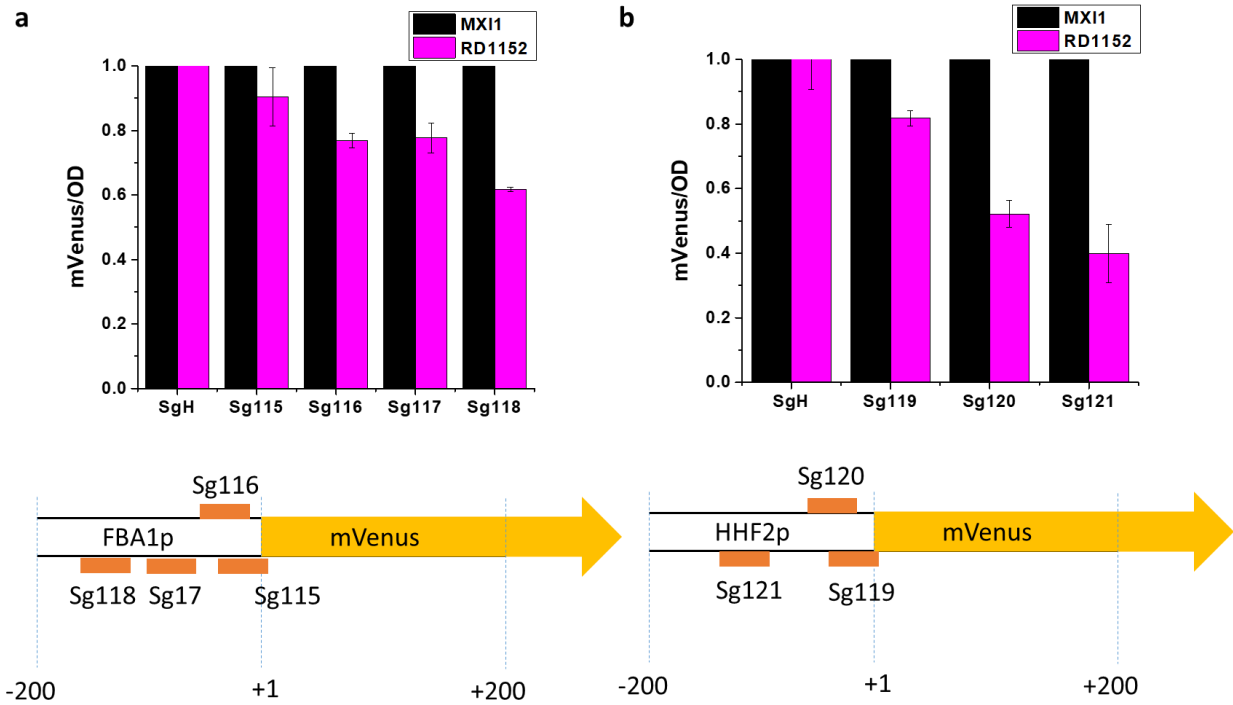

**Supplementary Figure 6 | CRISPRi using the engineered repression domain for additional reporter strains.** The CRISPRi efficiency using dSpCas9-MXI1 and dSpCas9-RD1152 was compared for strain CF (**a**) and strain CH (**b**), targeting *FBA1p* and *HHF2p*, respectively (**Supplementary Table S11**). The CRISPRi efficiency was normalized to that achieved using dSpCas9-MXI1. Error bars represent the mean  $\pm$  s.d. of biological quadruplicates.

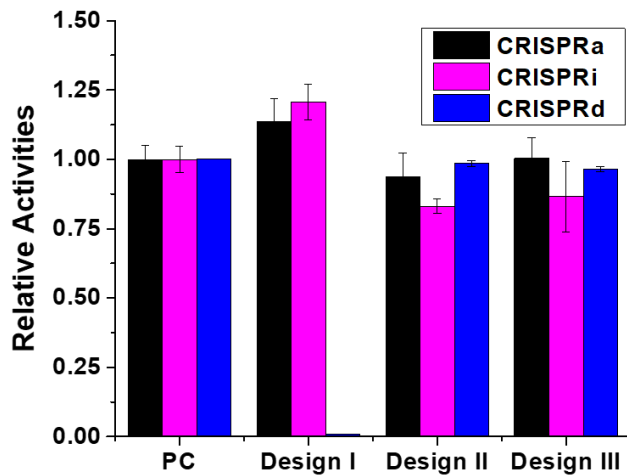

- PC: Individual gRNA cassette
- Design I: SNR52p-gRNAa-Csy4-gRNAi-Csy4-gRNAd-SUP4t
- Design II: [SNR52p-gRNAa-SUP4t]-[SNR52p-gRNAi-SUP4t]-[SNR52p-gRNAd-SUP4t]
- Design III: TEF1p-Csy4-gRNAa-Csy4-gRNAi-Csy4-gRNAd-Csy4-CY1t

**Supplementary Figure 7 | Multiplex gRNA design for CRISPR-AID.** Design I: expression of multiple gRNAs in a single cassette driven by a type III promoter (*SNR52p*). Design II: expression of multiple gRNAs in multiple cassettes driven by a type III promoter (*SNR52p*). Design III: expression of multiple gRNAs in a single cassette driven by a type II promoter (*TEF1p*). Plasmids containing only one gRNA cassette were included as positive controls. Design I allowed the expression of no more than 2 gRNAs. Design II and Design III allowed the expression of full length multiple gRNAs with genome engineering efficiency comparable to those with one gRNA. Error bars represent the mean  $\pm$  s.d. of biological quadruplicates.

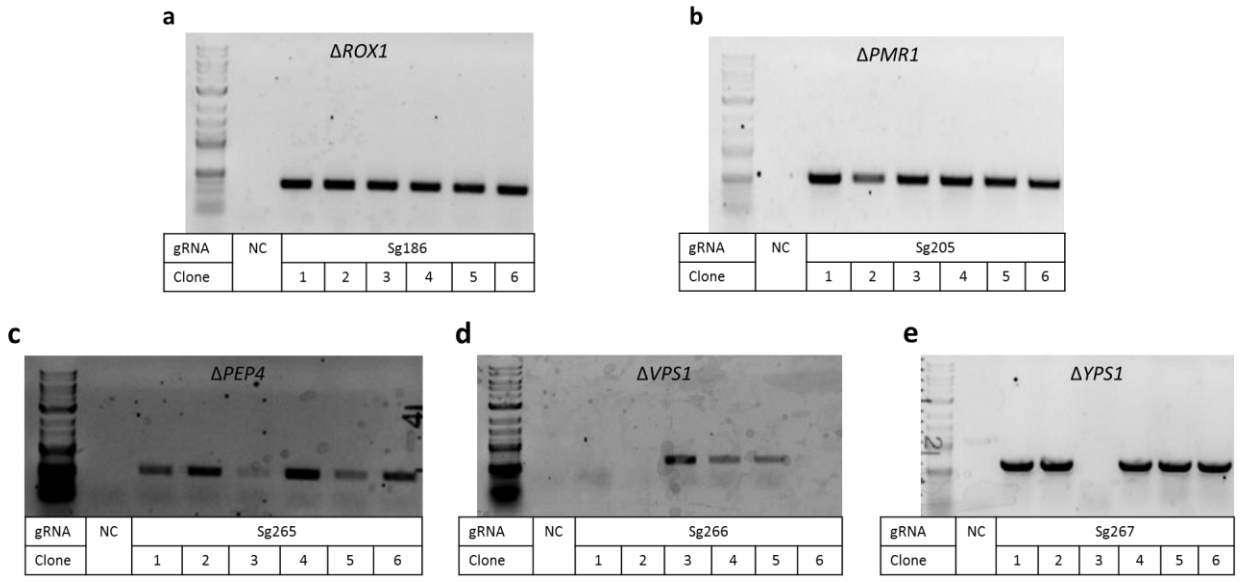

**Supplementary Figure 8 | Diagnostic PCR verification of the deletion of the targeted genes by CRISPRd.** After transformation of the corresponding gRNAs, single clones were picked up from the selection plates and cultured in liquid medium. Then genomic DNAs were extracted and subject to diagnostic PCR, with an amplicon only when the desired gene was disrupted.



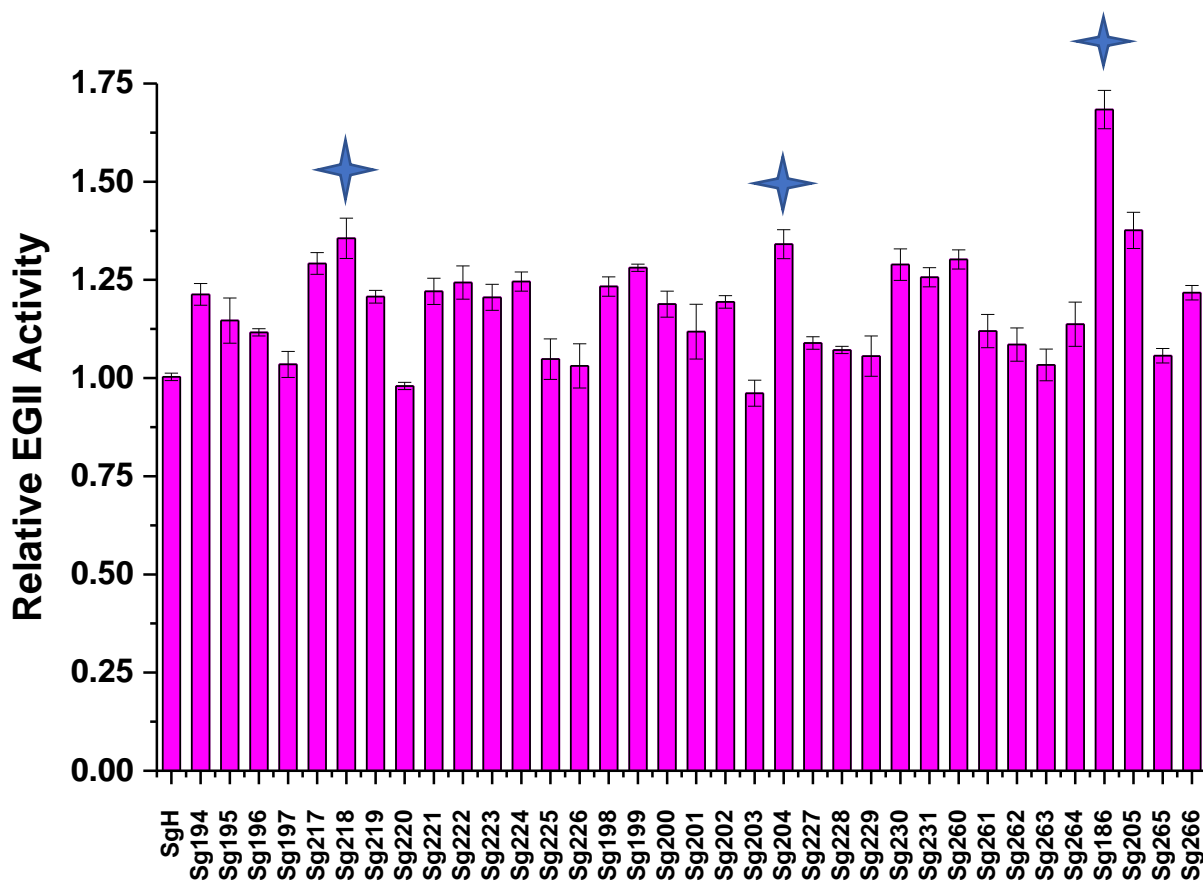

**Supplementary Figure 9 | EGII activity with one gRNA.** 14 CRISPRa, 17 CRISPRi, and 5 CRISPRd targets were chosen, most of which resulted in improved protein display level and EGII activity. Sg218 (*ERO2*), Sg204 (*PMRI*), and Sg186 (*ROX1*) worked the best for CRISPRa, CRISPRi, and CRISPRd, respectively. The gRNA plasmids were transformed into CEN-EGII and the resultant recombinant strains were cultured in SED-HIS-URA/G418 medium for ~3 days for cellulase activity assays. Error bars represent the mean  $\pm$  s.d. of biological triplicates.

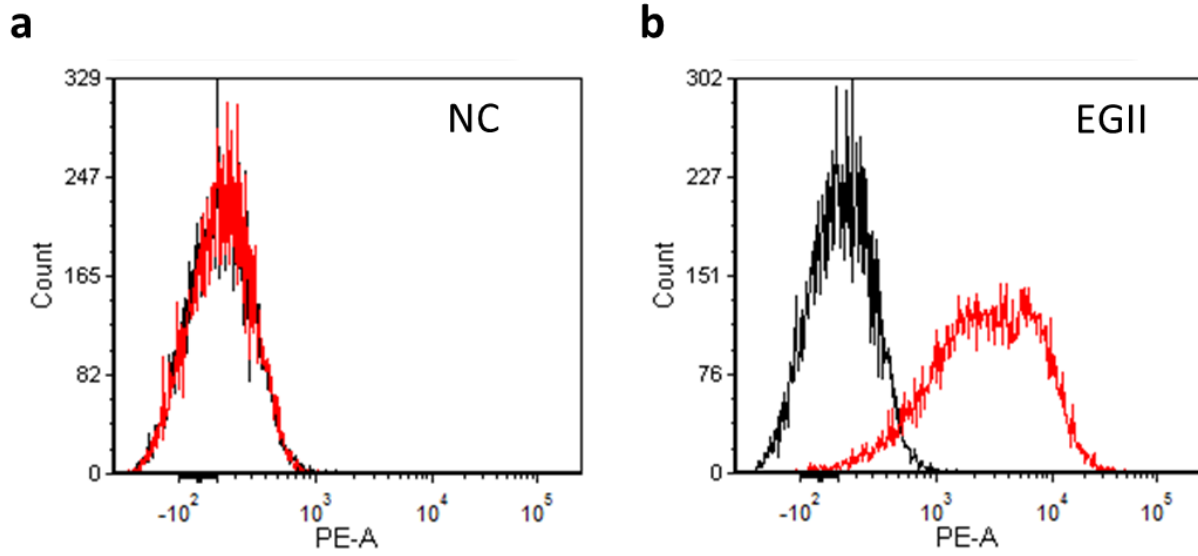

**Supplementary Figure 10 | Quantification of recombinant proteins displayed on yeast surface using immunostaining.** The unstained (black) and PE stained (red) control yeast strain (a) and EGII-displaying strain (b) were analyzed by flow cytometry.

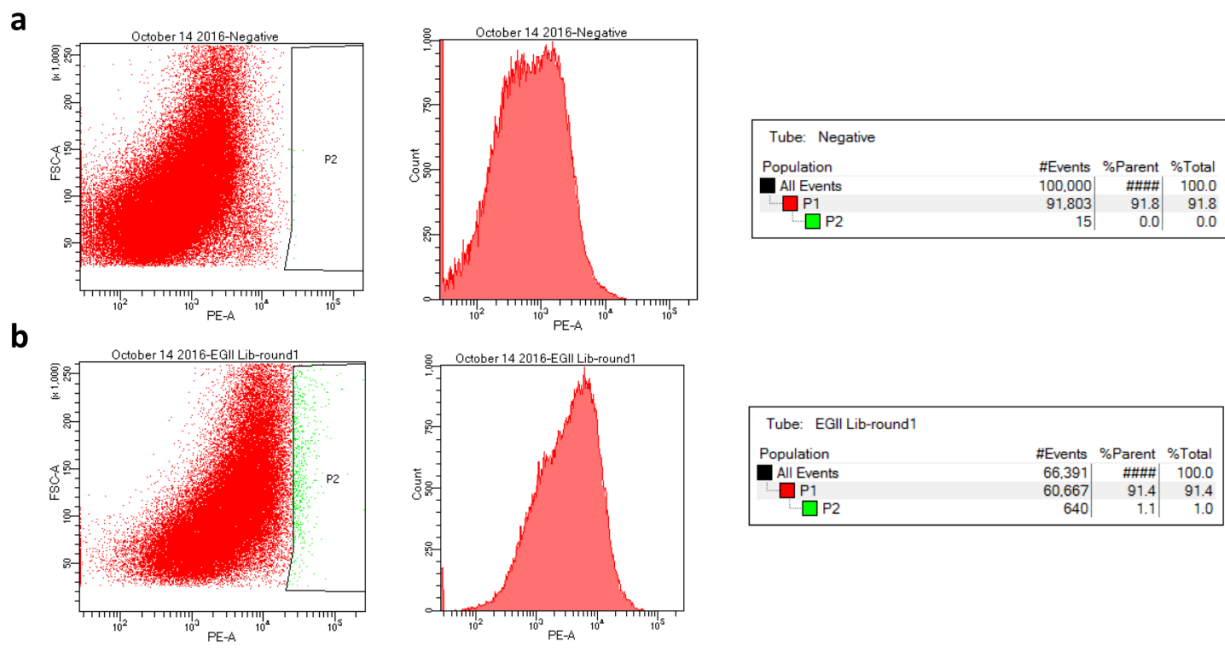

**Supplementary Figure 11 | FACS sorting of the EGII-displaying library.** FACS sorting profiles of the control yeast strain (a) and EGII-displaying library (b). The gate P2 was set to collect yeast cells with top 1% of the highest fluorescence.

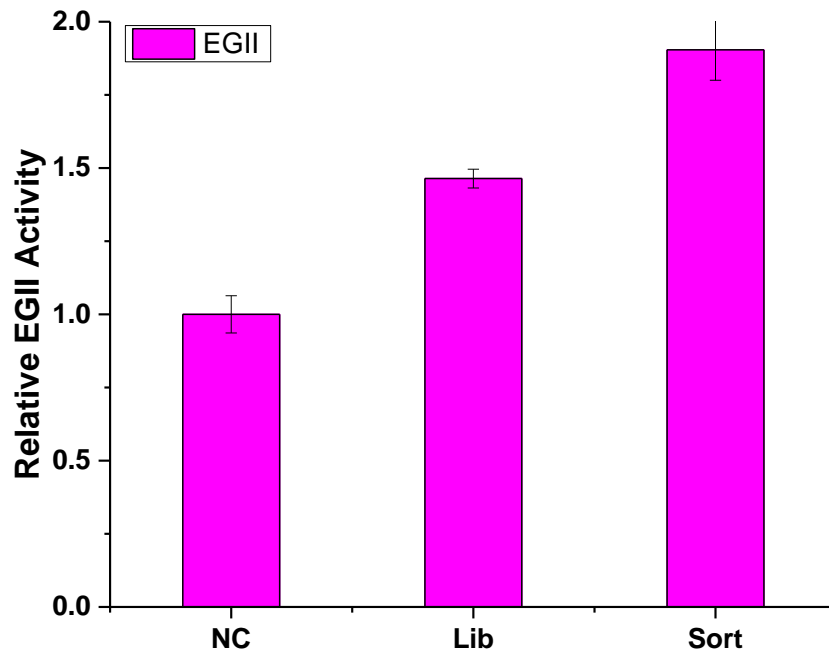

**Supplementary Figure 12 | EGII activity of the transformed library and the FACS sorted library.** The library strains were cultured in SED-HIS-URA/G418 medium for ~3 days for cellulase activity assays. Error bars represent the mean  $\pm$  s.d. of biological triplicates.

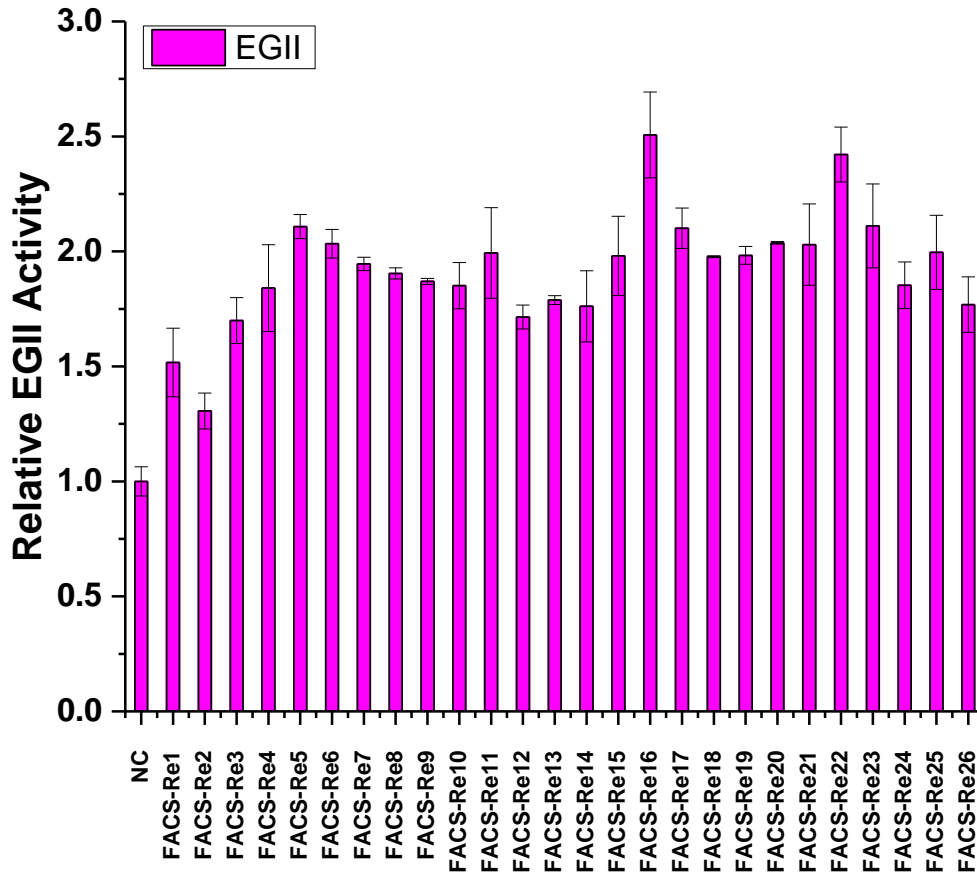

**Supplementary Figure 13 | EGII activity of the FACS sorted individual clones.** 96 single clones with the highest fluorescence signals were sorted using FACS, and the plasmids were extracted and re-transformed into CEN-EGII strain with a fresh background. 26 yeast strains showing the highest PE fluorescence intensity after re-transformation were chosen for cellulase activity assays. FACS-Re16 and FACS-Re22 showed the highest EGII activity. Error bars represent the mean  $\pm$  s.d. of biological triplicates.

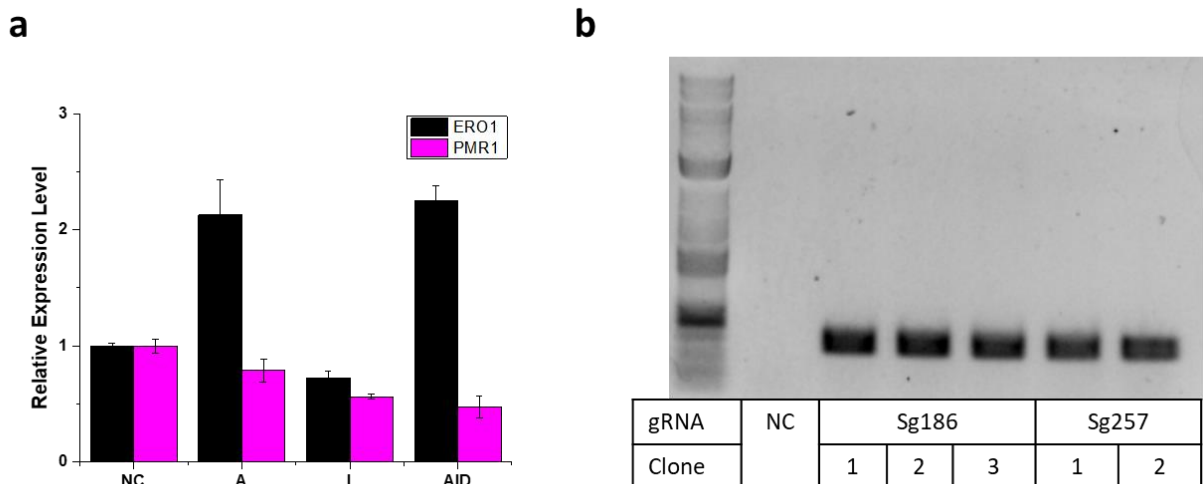

**Supplementary Figure 14 | Single factor optimization using CRISPR-AID.** The top candidates from each category (A-pSg218, *ERO1* activation; I-pSg204, *PMR1* interference; and D-pSg186, *ROX1* deletion) were combined (AID-pSg257) and characterized. Transcriptional regulation and genome editing were verified using qPCR and diagnostic PCR, respectively. **(a)** Verification of CRISPRa (*ERO1*) and CRISPRi (*PMR1*) for transcriptional regulation using qPCR. Error bars represent the mean  $\pm$  s.d. of biological triplicates. **(b)** Verification of the disruption of *ROX1* in D (pSg186, 3 independent clones) and AID (pSg257, 2 independent clones) strains using diagnostic PCR.

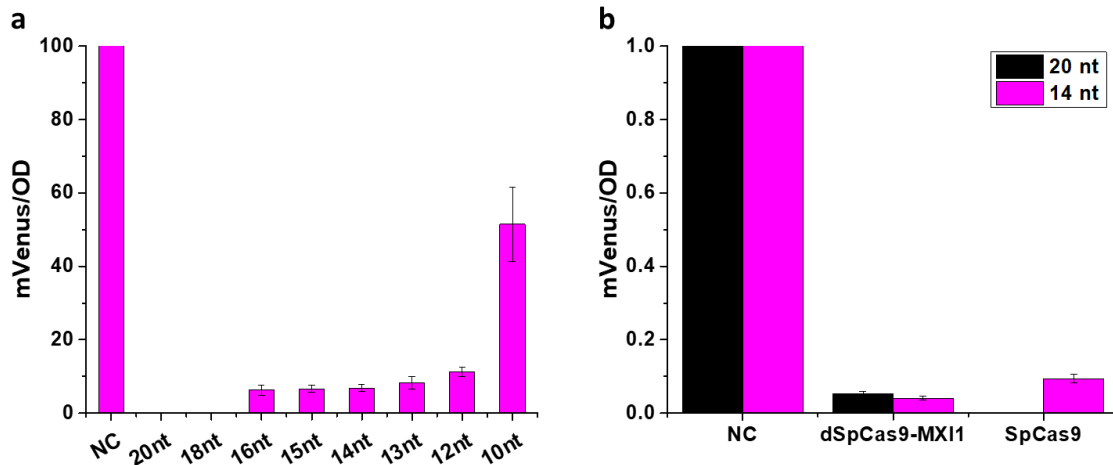

**Supplementary Figure 15 | CRISPRi using truncated gRNAs.** (a) Effect of gRNA truncation on CRISPRi efficiency. gRNAs with different length of targeting sequences were tested in catalytically active SpCas9 containing yeast strain. If the targeting sequences were longer than 16nt, no survival clones could be obtained, due to the introduction of a double strand break in the genome by the catalytically active Cas9. When the targeting sequences were between 16 and 12nt, efficient transcriptional regulation (CRISPRi in this case) could be achieved. If the targeting sequences was shorted than 12nt, CRISPRi efficiency was dramatically decreased. (b) A comparison of CRISPRi efficiency using full length and truncated gRNAs. The full length (Sg1) and truncated (Sg27) gRNAs were transformed into dSpCas9-MXI1 containing yeast strain and resulted in comparable CRISPRi efficiency. Error bars represent the mean  $\pm$  s.d. of biological quadruplicates.

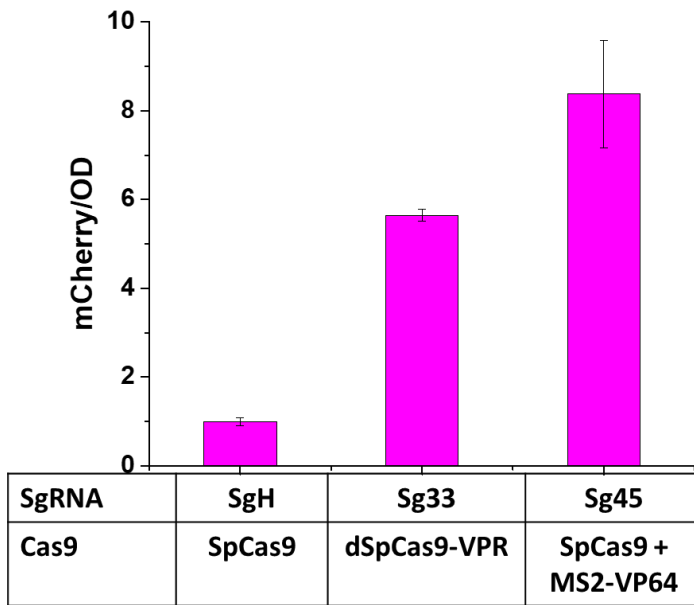

**Supplementary Figure 16 | CRISPRa using modular RNA scaffold.** MS2 aptamer was included in Sg45, and the specific RNA binding protein (MS2) would recruit VP64 to activate the expression of *mCherry* under the control of *CYC1p*. CRISPRa efficiency was comparable with that achieved using dSpCas9-VPR. Error bars represent the mean  $\pm$  s.d. of biological quadruplicates.



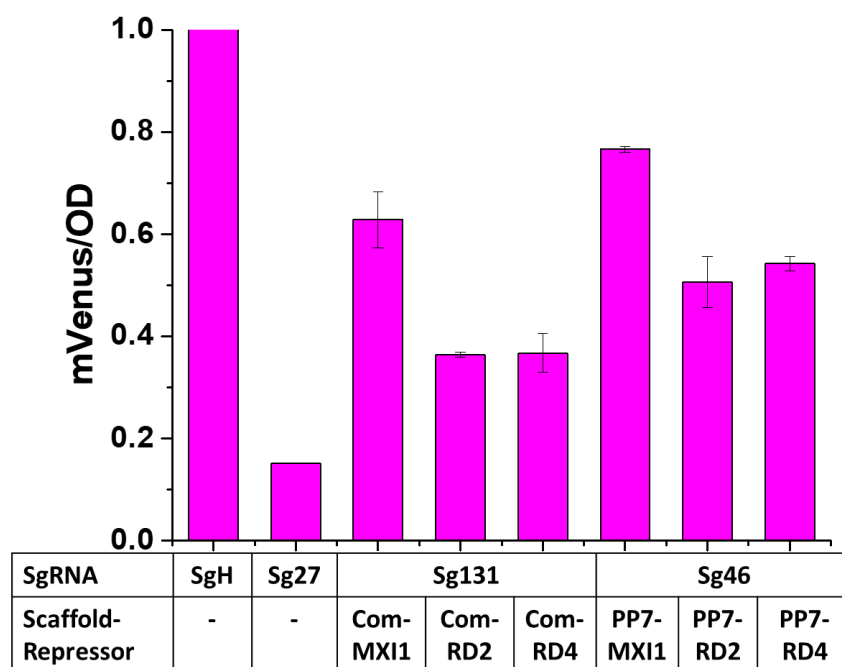

**Supplementary Figure 17 | CRISPRi using engineered modular RNA scaffold.** The fusion of an aptamer resulted in much lower CRISPRi efficiency, even though a repression domain was recruited through the specific RNA binding protein. The use of different aptamers and repression domains did not increase CRISPRi efficiency significantly. A much higher CRISPRi efficiency could be achieved using Sg27, without the inclusion of an aptamer and a repression domain. Notably, such high CRISPRi efficiency could only be achieved for a few cases when targeting the promoter region, if no repression domain was included. Error bars represent the mean  $\pm$  s.d. of biological quadruplicates.

**Supplementary Table 1 | CRISPR protein orthologues.**

|         | PAM                 |
|---------|---------------------|
| SpCas9  | 5'-guide-NGG3'      |
| NmCas9  | 5'-guide-NNNNGAAT3' |
| St1Cas9 | 5'-guide-NNAGAAW3'  |
| SaCas9  | 5'-guide-NNGRRT3'   |
| AsCpf1  | 5'-TTTN-guide-3'    |
| LbCpf1  | 5'-TTTN-guide-3'    |

The gRNA structure sequences as well as the PAM sequences are different, both of which endow the activity of these CRISPR proteins to be orthogonal.

**Supplementary Table 2 | Repression domains for CRISPRi in yeast.**

|      | Repressor         | Domain (aa) | Function (From SGD)                                                                                                              |
|------|-------------------|-------------|----------------------------------------------------------------------------------------------------------------------------------|
| RD1  | TUP1 <sup>1</sup> | 1-200       | General transcription repressor that binds histones and is involved in nucleosome positioning; forms repressor complex with CYC8 |
| RD2  |                   | 73-129      |                                                                                                                                  |
| RD3  |                   | 277-340     |                                                                                                                                  |
| RD4  |                   | 73-340      |                                                                                                                                  |
| RD5  | MIG1 <sup>2</sup> | 481-504     | Transcription factor involved in glucose repression                                                                              |
| RD6  |                   | 380-504     |                                                                                                                                  |
| RD7  | CRT1 <sup>3</sup> | 1-130       | Major transcriptional repressor of DNA-damage-regulated genes                                                                    |
| RD8  |                   | 1-240       |                                                                                                                                  |
| RD9  |                   | 709-811     |                                                                                                                                  |
| RD10 | XTC1 <sup>4</sup> | 75-100      | A direct transcriptional repressor                                                                                               |
| RD11 | UME6 <sup>5</sup> | 508-594     | Represses transcription by recruiting conserved histone deacetylase RPD3 and chromatin-remodeling factor ISW2                    |

Well-characterized repression domains were chosen. The ideal repression domain should be small while demonstrating strong transcriptional repression.

**Supplementary Table 3 | CRISPR-AID library for EGII display on yeast surface.**

| CRISPRa | Target             | CRISPRi | Target             | CRISPRd | Target            |
|---------|--------------------|---------|--------------------|---------|-------------------|
| Sg194   | PEX5               | Sg198   | SED1               | Sg186   | ROX1 <sup>6</sup> |
| Sg195   | PEX5               | Sg199   | SED1               | Sg205   | PMR1              |
| Sg196   | PTI1               | Sg200   | SED1               | Sg265   | PEP4 <sup>7</sup> |
| Sg197   | PTI1               | Sg201   | YCH1               | Sg266   | VPS8 <sup>7</sup> |
| Sg217   | CCW12 <sup>8</sup> | Sg202   | YCH1               | Sg267   | YPS1 <sup>9</sup> |
| Sg218   | ERO1 <sup>8</sup>  | Sg203   | YCH1               |         |                   |
| Sg219   | HAC1 <sup>10</sup> | Sg204   | YMR1 <sup>11</sup> |         |                   |
| Sg220   | KAR2 <sup>12</sup> | Sg227   | OCH1 <sup>13</sup> |         |                   |
| Sg221   | PDI1 <sup>12</sup> | Sg228   | OCH1               |         |                   |
| Sg222   | SEC1 <sup>14</sup> | Sg229   | OCH1               |         |                   |
| Sg223   | SLY1 <sup>14</sup> | Sg230   | MNN9 <sup>13</sup> |         |                   |
| Sg224   | SSO1 <sup>15</sup> | Sg231   | MNN9               |         |                   |
| Sg225   | SSO2 <sup>15</sup> | Sg260   | PMR1               |         |                   |
| Sg226   | UBI4 <sup>16</sup> | Sg261   | PMR1               |         |                   |
|         |                    | Sg262   | KEX2 <sup>9</sup>  |         |                   |
|         |                    | Sg263   | KEX2               |         |                   |
|         |                    | Sg264   | KEX2               |         |                   |

The empty vector without gRNA sequences was also included in the library, and a library covered all the possible combinations ( $15 \times 18 \times 6 = 1620$ ) was created.

**Supplementary Table 4 | Sequencing results of random clones of the combinatorial library for EGII display on yeast surface.**

|               | A     | I     | D     |
|---------------|-------|-------|-------|
| EGII-Random 1 | Sg221 | Sg230 | Sg265 |
| EGII-Random 2 | Sg225 | Sg263 | Sg205 |
| EGII-Random 3 | Sg219 | Sg261 | Sg267 |
| EGII-Random 4 | Sg226 | Sg264 | Sg205 |
| EGII-Random 5 | Sg225 | Sg262 | SgH   |
| EGII-Random 6 | SgH   | Sg231 | Sg265 |

**Supplementary Table 5 | Sequencing results of top clones of the combinatorial library for EGII display on yeast surface.**

|             | A     | I    | D    |
|-------------|-------|------|------|
| EGII-FACS5  | CCW12 | MNN9 | PMR1 |
| EGII-FACS11 | CCW12 | MNN9 | PMR1 |
| EGII-FACS16 | PDI1  | MNN9 | PMR1 |
| EGII-FACS17 | SEC1  | MNN9 | PMR1 |
| EGII-FACS22 | PDI1  | MNN9 | PMR1 |
| EGII-FACS23 | SLY1  | MNN9 | PEP4 |

The top clones were obtained by FACS sorting of the combinatorial library and cellulase activity assay verification.

**Supplementary Table 6 | Plasmids used in this study.**

| Plasmids                                         | Genotype                                                                                        | Reference               |
|--------------------------------------------------|-------------------------------------------------------------------------------------------------|-------------------------|
| pRS406                                           | Integrative vector with <i>URA3</i> marker                                                      |                         |
| pH1                                              | pRS425-PDC1p-eGFP-ADH1t                                                                         | 17,18                   |
| pH3                                              | pRS425-ENO2p-eGFP-CYC1t-TPI1p                                                                   | 17,18                   |
| pH4                                              | pRS425-TPI1p-eGFP-TPI1t-TEF1p                                                                   | 17,18                   |
| pH5                                              | pRS425-TEF1p-eGFP-TEF1t                                                                         | 17,18                   |
| pH6                                              | pRS425-TEF1t-PGK1p-BamHI-HXT7t                                                                  | 17,18                   |
| p41K-CEN-Delta                                   | pRS-KanMX-Delta1-PmeI-CEN/ARS-PmeI-Delta2                                                       | 19                      |
| pcDNA-NMdcas9-VPR                                | Harboring dNmCas9-VPR                                                                           | 20                      |
| pcDNA-SPdcas9-VPR                                | Harboring dSpCas9-VPR                                                                           | 20                      |
| M-ST1n-VPR                                       | Harboring dSt1Cas9-VPR                                                                          | Addgene <sup>21</sup>   |
| AAV-NLS-dSaCas9-NLS-VPR                          | Harboring dSaCas9-VPR                                                                           | Addgene <sup>22</sup>   |
| pCR                                              | Harboring SpSgRNA scaffold in <i>BsaI</i> -free pRS423                                          | 23                      |
| pCT                                              | Harboring SpCas9                                                                                | 23                      |
| pTDH3-dCas9-Mxi1                                 | Harboring TDH3p-dSpCas9-MXI1-ADH1t                                                              | 24                      |
| pSimpleII-U6-tracr-U6-BsmBI-NLS-NmCas9-HA-NLS(s) | Harboring NmCas9 and NmSgRNA scaffold                                                           | Addgene <sup>25</sup>   |
| MSP1673                                          | Harboring St1Cas9 and St1SgRNA scaffold                                                         | Addgene <sup>26</sup>   |
| BPK2139                                          | Harboring SaCas9                                                                                | Addgene <sup>26</sup>   |
| pcDNA3.1-hAsCpf1                                 | Harboring AsCpf1                                                                                | Addgene <sup>27</sup>   |
| pcDNA3.1-hLbCpf1                                 | Harboring LbCpf1                                                                                | Addgene <sup>27</sup>   |
| VVT1                                             | Harboring SaSgRNA scaffold                                                                      | Addgene <sup>26</sup>   |
| pJZC588                                          | SgRNA with 2x MS2 (wt+f6)                                                                       | Addgene <sup>28</sup>   |
| pJZC603                                          | SgRNA with 2x PP7                                                                               | Addgene <sup>28</sup>   |
| pJZC620                                          | Harboring dCas9, MCP-VP64, and PCP-VP64                                                         | Addgene <sup>28</sup>   |
| YIplac211-YB/E/I                                 | Yeast integrative vector with <i>URA3</i> marker and CrtYB, CrtE, and CrtI expression cassettes | Euroscarf <sup>29</sup> |
| YIplac128-I                                      | Yeast integrative vector with <i>LEU2</i> marker and CrtI expression cassettes                  | Euroscarf <sup>29</sup> |
| p406-CT                                          | pRS406-CYC1p-mCherry-TEF1t-TEF1p-mVenus-PGK1t                                                   | This study              |
| p406-CF                                          | pRS406-CYC1p-mCherry-TEF1t-FBA1p-mVenus-PGK1t                                                   | This study              |
| p406-CH                                          | pRS406-CYC1p-mCherry-TEF1t-HHF2p-mVenus-PGK1t                                                   | This study              |
| p406-CR1                                         | pRS406-CYC1p-mCherry-TEF1t-REV1p-mVenus-PGK1t                                                   | This study              |
| p406-CR2                                         | pRS406-CYC1p-mCherry-TEF1t-RNR2p-mVenus-PGK1t                                                   | This study              |
| p406-YD-EGII                                     | pRS406-TEF1p-prepro-HisTag-EGII-GS-cSAG1-PGK1t                                                  | This study              |
| pH5-SpCas9                                       | pRS425-TEF1p-NLS-SpCas9-NLS-TEF1t                                                               | This study              |
| pH5-NmCas9                                       | pRS425-TEF1p-NLS-NmCas9-NLS-TEF1t                                                               | This study              |
| pH5-St1Cas9                                      | pRS425-TEF1p-St1Cas9-NLS-TEF1t                                                                  | This study              |
| pH5-SaCas9                                       | pRS425-TEF1p-SaCas9-NLS-TEF1t                                                                   | This study              |
| pH5-AsCpf1                                       | pRS425-TEF1p-AsCpf1-NLS-TEF1t                                                                   | This study              |
| pH5-LbCpf1                                       | pRS425-TEF1p-LbCpf1-NLS-TEF1t                                                                   | This study              |
| pSgH                                             | pRS423*( <i>BsaI</i> -free)-SNR52p-BsaI-BsaI-SUP4t                                              | This study              |
| pSpSgH                                           | pRS423*( <i>BsaI</i> -free)-SNR52p-BsaI-BsaI-SpSgRNA-SUP4t                                      | This study              |
| pNmSgH                                           | pRS423*( <i>BsaI</i> -free)-SNR52p-BsaI-BsaI-NmSgRNA-SUP4t                                      | This study              |
| pSt1SgH                                          | pRS423*( <i>BsaI</i> -free)-SNR52p-BsaI-BsaI-St1SgRNA-SUP4t                                     | This study              |

|                        |                                                                                                                |            |
|------------------------|----------------------------------------------------------------------------------------------------------------|------------|
| pSaSgH                 | pRS423*(BsaI-free)-SNR52p-BsaI-BsaI-SaSgRNA-SUP4t                                                              | This study |
| pRS423-H5              | pRS423-TEF1p-eGFP-TEF1t                                                                                        | This study |
| pH5-NLS-St1Cas9        | pRS425-TEF1p-NLS-St1Cas9-NLS-TEF1t                                                                             | This study |
| pH5-NLS-SaCas9         | pRS425-TEF1p-NLS-SaCas9-NLS-TEF1t                                                                              | This study |
| pH5-NLS-AsCpf1         | pRS425-TEF1p-NLS-AsCpf1-NLS-TEF1t                                                                              | This study |
| pH5-NLS-LbCpf1         | pRS425-TEF1p-NLS-LbCpf1-NLS-TEF1t                                                                              | This study |
| pTDH3-dLbCpf1-MXI1     | pTDH3p-dLbCpf1-MXI1-ADH1t                                                                                      | This study |
| pTDH3-dLbCpf1-V        | pTDH3p-dLbCpf1-V-ADH1t                                                                                         | This study |
| pTDH3-dLbCpf1-VP       | pTDH3p-dLbCpf1-VP-ADH1t                                                                                        | This study |
| pTDH3-dLbCpf1-VPR      | pTDH3p-dLbCpf1-VPR-ADH1t                                                                                       | This study |
| pH6-dSpCas9-V          | pRS425-PGK1p-dSpCas9-V-HXT7t                                                                                   | This study |
| pH6-dSpCas9-VP         | pRS425-PGK1p-dSpCas9-VP-HXT7t                                                                                  | This study |
| pH6-dSpCas9-VPR        | pRS425-PGK1p-dSpCas9-VPR-HXT7t                                                                                 | This study |
| pH6-dSt1Cas9-V         | pRS425-PGK1p-dSt1Cas9-V-HXT7t                                                                                  | This study |
| pH6-dSt1Cas9-VP        | pRS425-PGK1p-dSt1Cas9-VP-HXT7t                                                                                 | This study |
| pH6-dSt1Cas9-VPR       | pRS425-PGK1p-dSt1Cas9-VPR-HXT7t                                                                                | This study |
| pH6-dSaCas9-V          | pRS425-PGK1p-dSaCas9-V-HXT7t                                                                                   | This study |
| pH6-dSaCas9-VP         | pRS425-PGK1p-dSaCas9-VP-HXT7t                                                                                  | This study |
| pH6-dSaCas9-VPR        | pRS425-PGK1p-dSaCas9-VPR-HXT7t                                                                                 | This study |
| pTDH3-dSpCas9-RD1      | pTDH3p-dSpCas9-RD1-ADH1t                                                                                       | This study |
| pTDH3-dSpCas9-RD2      | pTDH3p-dSpCas9-RD2-ADH1t                                                                                       | This study |
| pTDH3-dSpCas9-RD3      | pTDH3p-dSpCas9-RD3-ADH1t                                                                                       | This study |
| pTDH3-dSpCas9-RD4      | pTDH3p-dSpCas9-RD4-ADH1t                                                                                       | This study |
| pTDH3-dSpCas9-RD5      | pTDH3p-dSpCas9-RD5-ADH1t                                                                                       | This study |
| pTDH3-dSpCas9-RD6      | pTDH3p-dSpCas9-RD6-ADH1t                                                                                       | This study |
| pTDH3-dSpCas9-RD7      | pTDH3p-dSpCas9-RD7-ADH1t                                                                                       | This study |
| pTDH3-dSpCas9-RD8      | pTDH3p-dSpCas9-RD8-ADH1t                                                                                       | This study |
| pTDH3-dSpCas9-RD9      | pTDH3p-dSpCas9-RD9-ADH1t                                                                                       | This study |
| pTDH3-dSpCas9-RD10     | pTDH3p-dSpCas9-RD10-ADH1t                                                                                      | This study |
| pTDH3-dSpCas9-RD11     | pTDH3p-dSpCas9-RD11-ADH1t                                                                                      | This study |
| pTDH3-RD2-dSpCas9-RD5  | pTDH3p-RD2-dSpCas9-RD5-ADH1t                                                                                   | This study |
| pTDH3-RD2-dSpCas9-RD11 | pTDH3p-RD2-dSpCas9-RD11-ADH1t                                                                                  | This study |
| pTDH3-RD5-dSpCas9-RD11 | pTDH3p-RD5-dSpCas9-RD11-ADH1t                                                                                  | This study |
| pTDH3-dSpCas9-RD1152   | pTDH3p-dSpCas9-RD11-RD5-RD2-ADH1t                                                                              | This study |
| pH4-dSpCas9-RD1152     | pRS425-TPI1p-dSpCas9-RD11-RD5-RD2-TPI1t-TEF1p                                                                  | This study |
| pH3-Csy4               | pRS425-ENO2p-Csy4-PGK1t-TPI1p                                                                                  | This study |
| pAID6                  | p41K-CEN-Delta-TDH3p-dLbCpf1-VP-ADH1t-ENO2p-Csy4-PGK1t-TPI1p-dSpCas9-RD11-RD5-RD2-TPI1t-TEF1p-SaCas9-NLS-TEF1t | This study |
| pSpMS2SgH              | pRS423*-SNR52p-BsaI-BsaI-SpSgRNA-MS2-SUP4t                                                                     | This study |
| pSpPP7SgH              | pRS423*-SNR52p-BsaI-BsaI-SpSgRNA-PP7-SUP4t                                                                     | This study |
| pSpComSgH              | pRS423*-SNR52p-BsaI-BsaI-SpSgRNA-Com-SUP4t                                                                     | This study |
| pH1-PP7-MXI1           | pRS425-PDC1p-PP7-MXI1-ADH1t                                                                                    | This study |
| pH1-PP7-RD2            | pRS425-PDC1p-PP7-RD2-ADH1t                                                                                     | This study |
| pH1-PP7-RD4            | pRS425-PDC1p-PP7-RD4-ADH1t                                                                                     | This study |



|              |                                   |            |
|--------------|-----------------------------------|------------|
| pH1-Com-MXI1 | pRS425-PDC1p-Com-MXI1-ADH1t       | This study |
| pH1-Com-RD2  | pRS425-PDC1p-Com-RD2-ADH1t        | This study |
| pH1-Com-RD4  | pRS425-PDC1p-Com-RD4-ADH1t        | This study |
| pH4-MS2-VP64 | pRS425-TPI1p-MS2-VP64-TPI1t-TEF1p | This study |

**Supplementary Table 7 | gRNA plasmids constructed in this study.**

| Plasmid | Cas9  | Target                                                                | AID | Position         | Strand | Protospacer              | PAM      |
|---------|-------|-----------------------------------------------------------------------|-----|------------------|--------|--------------------------|----------|
| pSg1    | Sp    | TEF1p                                                                 | i   | -115 to -134     | t      | ttgatattaagttattaa       | tgg      |
| pSg6    | Sp    | CYC1p                                                                 | a   | -183 to -202     | t      | actttagtctgacacatac      | agg      |
| pSg10   | Sp    | ADE2                                                                  | d   | 157 to 177       | nt     | gatatcaagaggattggaaa     | agg      |
| pSg11   | Sp    | Same as psg10, except that 100 bp hr donor was integrated (HI-CRISPR) |     |                  |        |                          |          |
| pSg12   | Nm    | ADE2                                                                  | d   | 394 tp 413       | t      | acgtccctattgaatgttg      | aagagatt |
| pSg13   | Nm    | ADE2                                                                  | d   | 826 to 845       | t      | aactctggacattataccat     | tgatgctt |
| pSg14   | St1   | ADE2                                                                  | d   | 548 to 567       | t      | aaaaatgggcaccatttact     | aaagaat  |
| pSg15   | St1   | ADE2                                                                  | d   | 622 to 641       | t      | ccaattgtagagactatcca     | caagga   |
| pSg27   | Sp    | TEF1p                                                                 | i   | -115 to -128     | t      | tttaagttattaa            | tgg      |
| pSg28   | Sp    | TEF1p                                                                 | i   | -125 to -138     | nt     | taaatatcaatggg           | agg      |
| pSg29   | Nm    | ADE2                                                                  | d   | 871 to 890       | t      | gaagctcatttgagatcaat     | attggatt |
| pSg30   | St1   | ADE2                                                                  | d   | 466 to 485       | t      | ggaagaggtaacttcgttgt     | aaagaat  |
| pSg31   | Sa    | ADE2                                                                  | d   | 833 to 855       | nt     | gcaagcatcaatggtataatgct  | cagagt   |
| pSg32   | Nm    | ADE2                                                                  | d   | 473 to 496       | t      | gtaacttcgttgtaaagaataagg | aaatgatt |
| pSg33   | Sp    | CYC1p                                                                 | a   | -183 to -196     | t      | gtgctgacacatac           | agg      |
| pSg35   | Sp    | TEF1p                                                                 | i   | -115 to -134     | t      | gatatttaagttattaa        | tgg      |
| pSg36   | Sp    | TEF1p                                                                 | i   | -115 to -134     | t      | tatttaagttattaa          | tgg      |
| pSg37   | Sp    | TEF1p                                                                 | i   | -115 to -134     | t      | atttaagttattaa           | tgg      |
| pSg38   | Sp    | TEF1p                                                                 | i   | -115 to -134     | t      | ttaagttattaa             | tgg      |
| pSg39   | Sp    | TEF1p                                                                 | i   | -115 to -134     | t      | taagttattaa              | tgg      |
| pSg40   | Sp    | TEF1p                                                                 | i   | -115 to -134     | t      | agttattaa                | tgg      |
| pSg45   | SpMS2 | CYC1p                                                                 | a   | The same as Sg33 |        |                          |          |
| pSg46   | SpPP7 | TEF1p                                                                 | i   | The same as Sg27 |        |                          |          |
| pSg55   | Sp    | REV1p                                                                 | a   | -250 to -269     | t      | gaaaaaagtagcta           | agg      |
| pSg56   | Sp    | RNR2p                                                                 | a   | -242 to -261     | t      | ccgtaccataccct           | tgg      |
| pSg64   | St1   | ADE2                                                                  | d   | 621 to 640       | nt     | ggatagtctctacaattggg     | taagaaa  |
| pSg65   | Sa    | CYC1p                                                                 | a   | -217 to -239     | t      | tccgccaggcgtgtatatatagc  | gtggat   |
| pSg66   | Sa    | RNR2p                                                                 | a   | -203 to -225     | t      | aacgaagcaggaaatgagagaat  | gagagt   |
| pSg68   | As    | ADE2                                                                  | d   | 155 to 177       | nt     | gatatcaagaggattggaaaagg  | tttc     |
| pSg69   | Lb    | ADE2                                                                  | d   | 155 to 177       | nt     | gatatcaagaggattggaaaagg  | tttc     |
| pSg87   | Sa    | RNR2p                                                                 | a   | -203 to -223     | t      | cgaagcaggaaatgagagaat    | gagagt   |
| pSg88   | Sa    | RNR2p                                                                 | a   | -219 to -239     | nt     | cttcgttcatttcgagttcc     | aagggt   |
| pSg89   | Sa    | RNR2p                                                                 | a   | -384 to -404     | t      | cagacctcctgcgagcgggc     | atgggt   |
| pSg90   | Sa    | CYC1p                                                                 | a   | -217 to -237     | t      | cgccaggcgtgtatatatagc    | gtggat   |
| pSg91   | Sa    | CYC1p                                                                 | a   | -277 to -297     | t      | tcatttggcgagcgttggttg    | gtggat   |
| pSg92   | Sa    | CYC1p                                                                 | a   | -337 to -357     | t      | gatctttccggtctctttggc    | gtggat   |
| pSg93   | Sa    | ADE2d                                                                 | d   | 367 to 387       | nt     | ggcttgtccacaggaacact     | ttgggt   |
| pSg94   | Sa    | ADE2d                                                                 | d   | 438 to 458       | nt     | gceaaagtctcagactcaag     | acgaat   |
| pSg95   | Sa    | ADE2d                                                                 | d   | 695 to 715       | nt     | acaacttcgccttaagtgaa     | cggagt   |

|        |       |                   |   |                                                  |    |                          |         |
|--------|-------|-------------------|---|--------------------------------------------------|----|--------------------------|---------|
| pSg109 | Sp    | TEF1p             | i | 1 to -19                                         | t  | tctaagtttaattacaaaa      | tgg     |
| pSg110 | Sp    | mVenus            | i | 3 to 22                                          | t  | ggaattcgtgagcaagggcg     | tgg     |
| pSg111 | Sp    | mVenus            | i | 21 to 40                                         | t  | cgaggagctgtcaccgggg      | cgg     |
| pSg112 | Sp    | mVenus            | i | 38 to 57                                         | nt | gaccaggatgggcaccaccc     | agg     |
| pSg113 | Sp    | mVenus            | i | 54 to 73                                         | nt | cgtcgccgtccagctcgacc     | ggg     |
| pSg114 | Sp    | mVenus            | i | 140 to 159                                       | nt | ggtggtgcagatcagcttca     | tgg     |
| pSg115 | Sp    | FBA1p             | i | 1 to -19                                         | t  | caagtaatacatattcaaaa     | tgg     |
| pSg116 | Sp    | FBA1p             | i | -4 to -23                                        | nt | gaatatgtattacttggta      | tgg     |
| pSg117 | Sp    | FBA1p             | i | -48 to -67                                       | t  | aagaacagaagaataacgca     | agg     |
| pSg118 | Sp    | FBA1p             | i | -145 to -164                                     | t  | ttatcctcatgttctctaa      | cgg     |
| pSg119 | Sp    | HHF2p             | i | 1 to -19                                         | t  | caatcaatacaataaataa      | tgg     |
| pSg120 | Sp    | HHF2p             | i | -29 to -48                                       | nt | tactctttgaacaagatgt      | agg     |
| pSg121 | Sp    | HHF2p             | i | -107 to -120                                     | t  | ataagtatattaggatgagg     | cgg     |
| pSg122 | Lb    | ADE2              | d | 219 to 241                                       | nt | gtgtaggaaacatcaacatgctca | ttta    |
| pSg123 | Lb    | ADE2              | d | 282 to 304                                       | t  | cccttctccagaacaacatcagat | ttta    |
| pSg124 | Lb    | ADE2              | d | 430 to 452                                       | t  | ccattcgtcttgaagtcgaggac  | tttt    |
| pSg125 | Lb    | TEF1              | i | -101 to -123                                     | t  | agttattaatggcttcaattt    | ttta    |
| pSg126 | Lb    | TEF1              | i | -118 to -140                                     | nt | ataacttaaatatcaatgggagg  | ttta    |
| pSg127 | St1   | RNR2              | a | -210 to -229                                     | t  | aatgaacgaagcaggaatg      | agagaat |
| pSg128 | St1   | RNR2              | a | -308 to -327                                     | t  | gcgtgttgtgctgctgaca      | aaagaaa |
| pSg131 | SpCom | TEF1              | i | The same as Sg27                                 |    |                          |         |
| pSg135 | Lb    | TEF1              | i | -33 to -55                                       | t  | cttcttgctcattagaagaaag   | ttta    |
| pSg136 | Lb    | TEF1              | i | -5 to -27                                        | nt | taattaaaacttagattagattg  | tttg    |
| pSg137 | Lb    | mVenus            | i | 51 to 73                                         | nt | cgtcgccgtccagctcgaccagg  | ttta    |
| pSg138 | St1   | RNR2              | a | -277 to -296                                     | t  | tttcttagcaaagcaaagga     | ggggaa  |
| pSg139 | St1   | RNR2              | a | -220 to -239                                     | t  | ggaaactcgaatgaacgaa      | gcagga  |
| pSg140 | St1   | RNR2              | a | -274 to -293                                     | t  | cttagcaaagcaaaggaggg     | gaagca  |
| pSg141 | St1   | RNR2              | a | -164 to -183                                     | t  | atagcggtagtgtttgcgcg     | ttacca  |
| pSg142 | St1   | CYC1              | a | -327 to -346                                     | nt | gtaaaccgccgccaagaga      | ccggaa  |
| pSg143 | St1   | CYC1              | a | -226 to -245                                     | nt | acacgcctggcggatctgct     | cgagga  |
| pSg144 | St1   | CYC1              | a | -383 to -402                                     | t  | acctgaatctaaaattcccg     | ggagca  |
| pSg145 | Sa    | ADE2              | d | The same as Sg95, but with 100 bp HR (HI-CRISPR) |    |                          |         |
| pSg146 | St1   | CYC1              | a | -319 to -338                                     | t  | gccggggtttacggacgatg     | gcagaa  |
| pSg147 | St1   | REV1              | a | -247 to -266                                     | t  | gacggaaaaaagtagctaag     | gaagaa  |
| pSg148 | St1   | REV1              | a | -383 to -402                                     | nt | caaagcattcaattcaaatg     | aaagaa  |
| pSg149 | Lb    | RNR2              | a | -239 to -261                                     | nt | caagggtatggtacggtgctatc  | tttc    |
| pSg150 | Lb    | RNR2              | a | -309 to -331                                     | nt | tcagcagcaacaacacgctacgc  | tttg    |
| pSg155 | Lb    | CYC1              | a | -306 to -328                                     | t  | cggacgatggcagaagaccaaag  | ttta    |
| pSg156 | Lb    | CYC1              | a | -269 to -291                                     | t  | gcgagcgttgggtggtgatcaa   | tttg    |
| pSg157 | Lb    | CYC1              | a | -174 to -196                                     | t  | gtgctgacacatacaggcatata  | ttta    |
| pSg163 | AID6  | Sg156-Sg112-Sg145 |   |                                                  |    |                          |         |

|        |     |                                        |   |              |    |                         |        |
|--------|-----|----------------------------------------|---|--------------|----|-------------------------|--------|
| pSg172 | Sp  | ERG9                                   | i | -87 to -106  | t  | ataaatggaaagtaggaca     | ggg    |
| pSg175 | Lb  | HMG1                                   | a | -228 to -250 | t  | cggctatgaaaagctgtgttcg  | tttt   |
| pSg186 | Sa  | ROX1                                   | d | 68 to 88     | t  | actaccacaggatcttaatag   | acgaat |
| pSg194 | Lb  | PEX5                                   | a | -182 to -204 | nt | catattcgaagcttacaatcgag | ttta   |
| pSg195 | Lb  | PEX5                                   | a | -296 to -318 | t  | taccagcaatcagctgactaaca | ttta   |
| pSg196 | Lb  | PTI1                                   | a | -259 to -281 | t  | ttgctctfaccgactctgaaga  | ttta   |
| pSg197 | Lb  | PTI1                                   | a | -174 to -196 | nt | gcaagacctcaaacaatcgtact | tttc   |
| pSg198 | Sp  | SED1                                   | i | -165 to -187 | t  | gctggggtagaactagagta    | agg    |
| pSg199 | Sp  | SED1                                   | i | -127 to -146 | nt | ttatatgacagttcaaaaga    | ggg    |
| pSg200 | Sp  | SED1                                   | i | 101 to 120   | nt | ggaagtggagatggaagagg    | agg    |
| pSg201 | Sp  | YCH1                                   | i | -169 to -188 | t  | ctacatgcaaacgacaaata    | cgg    |
| pSg202 | Sp  | YCH1                                   | i | -61 to -80   | nt | gctgaaaactgtatgtgcgg    | agg    |
| pSg203 | Sp  | YCH1                                   | i | 43 to 62     | nt | atccaacgatgcaattcagt    | cgg    |
| pSg204 | Sp  | PMR1                                   | i | -107 to -126 | nt | aaatgggaatggaagaacg     | ggg    |
| pSg205 | Sa  | PMR1                                   | d | 683 to 703   | nt | atctctcagaatcggtaaaa    | ttgaat |
| pSg217 | Lb  | CCW12                                  | a | -242 to -264 | t  | caacaactatctgcgataactca | tttg   |
| pSg218 | Lb  | ERO1                                   | a | -221 to -243 | nt | cagggtcttctataagagaaacc | tttc   |
| pSg219 | Lb  | HAC1                                   | a | -266 to -288 | nt | agccctacttaatgctgagccac | tttt   |
| pSg220 | Lb  | KAR2                                   | a | -214 to -236 | t  | gctatgttagctgcaactttcta | tttt   |
| pSg221 | Lb  | PDI1                                   | a | -275 to -297 | t  | gaaacacgtgtcctgaaattat  | tttc   |
| pSg222 | Lb  | SEC1                                   | a | -235 to -257 | t  | aaaatcatcgaatagccgatcga | ttta   |
| pSg223 | Lb  | SLY1                                   | a | -217 to -239 | t  | ccagtcactatcatcatcatcat | tttt   |
| pSg224 | Lb  | SSO1                                   | a | -256 to -278 | nt | acgggcaaaaactggattctccc | ttta   |
| pSg225 | Lb  | SSO2                                   | a | -234 to -256 | t  | tgtcttacgagccgggtaccaag | ttta   |
| pSg226 | Lb  | UBI4                                   | a | -231 to -253 | t  | caggggcatgccacttatcagt  | tttt   |
| pSg227 | Sp  | OCH1                                   | i | -134 to -153 | nt | ggattggcgagaaataatgt    | cgg    |
| pSg228 | Sp  | OCH1                                   | i | -113 to -132 | nt | gcagatggggagagagaatg    | tgg    |
| pSg229 | Sp  | OCH1                                   | i | 20 to 39     | nt | tttcttgtagcgtacaggt     | ggg    |
| pSg230 | SP  | MNN9                                   | i | -112 to -131 | nt | gaaataacgggtccaagag     | cgg    |
| pSg231 | Sp  | MNN9                                   | i | 27 to 46     | nt | cccacgggttctttcttagg    | cgg    |
| pSg239 | AID | Sg175-Sg172-Sg186                      |   |              |    |                         |        |
| pSg257 | AID | Sg218-Sg204-Sg186                      |   |              |    |                         |        |
| pSg260 | Sp  | PMR1                                   | i | -129 to -148 | nt | gcgagcaaacactattatga    | tgg    |
| pSg261 | Sp  | PMR1                                   | i | 86 to 105    | nt | agaagggttggtttcgaaa     | ggg    |
| pSg262 | Sp  | KEX2                                   | i | -116 to -135 | nt | caaaacgggatatttaagcc    | agg    |
| pSg263 | Sp  | KEX2                                   | i | -76 to -95   | nt | agccgaatgaatgaatatg     | tgg    |
| pSg264 | Sp  | KEX2                                   | i | 56 to 75     | nt | ttgtgtgatgatacaagag     | cgg    |
| pSg265 | Sa  | PEP4                                   | d | 821 to 841   | t  | ttgaaggatcggtttagcg     | acgagt |
| pSg266 | Sa  | VPS8                                   | d | 470 to 490   | t  | tatgcatttgaactgaacg     | tagggt |
| pSg267 | Sa  | YPS1                                   | d | 1190 to 1210 | nt | atacgaataacctatcctgg    | aagagt |
| FACS16 | AID | Sg221-Sg230-Sg205 (the same as FACS22) |   |              |    |                         |        |

|        |    |                 |
|--------|----|-----------------|
| pSg417 | AI | Sg221-Sg230-SgH |
| pSg418 | AD | Sg221-SgH-Sg205 |
| pSg419 | ID | SgH-Sg230-Sg205 |
| pSg585 | AI | Sg175-Sg172-SgH |

**Supplementary Table 8 | Oligonucleotides used in this study.**

| Oligos      | Sequences (5'-3')                                                   | Applications                                          |
|-------------|---------------------------------------------------------------------|-------------------------------------------------------|
| CT-F1       | ctcactatagggcggaattgggtaccctcgagaattttttggaaaaccaag                 | Construct<br>p406-CT<br>(Gibson)                      |
| CT-R1       | gttatectectcgcccttgctcaccattattaatttagtgtgtatttg                    |                                                       |
| CT-F2       | cacaaatacacacactaaattaataatggtgagcaagggcgaggag                      |                                                       |
| CT-R2       | gcctgtgtctatcgataccgtcgacatagcggcgatcaaagtattg                      |                                                       |
| CT-F3       | teggcgctatgtcgacggatcgatagcaacaggcgcgttggac                         |                                                       |
| CT-R3       | ctaaagggaacaaaagctggagctccaggaagaatacactatactg                      |                                                       |
| CF-F        | cgctatgtcgac tgggtcattacgtaaataatgatag                              | p406-CF<br>(ligation)                                 |
| CF-R        | ctcacgaattccat ttgaaatgtattacttggttatg                              |                                                       |
| CH-F        | cgctatgtcgac gttttgacaccgagccatagc                                  | p406-CH<br>(ligation)                                 |
| CH-R        | ctcacgaattccat tattttattgtattgattgtg                                |                                                       |
| CR1-F       | cgctatgtcgac catccacatattttaatcac                                   | p406-CR1<br>(ligation)                                |
| CR1-R       | ctcacgaattccat cgtggtatgcctagaaatg                                  |                                                       |
| CR2-F       | cgctatgtcgac aactatgcgaaatccggagcaac                                | p406-CR2<br>(ligation)                                |
| CR2-R       | ctcacgaattccat ggttaattggacaaataaatac                               |                                                       |
| NmCas9-F    | gttcgaggatcc atggtgcctaagaagaagagaag                                | pH5-NmCas9<br>(ligation)                              |
| NmCas9-R    | caccgctcgag ttaatccagctctttttcttcg                                  |                                                       |
| St1Cas9-F   | gttcgaggatcc atgagcgacctggtgctggcgctg                               | pH5-St1Cas9<br>(ligation)                             |
| St1Cas9-R   | caccgctcgag tcacaccttctcttctcttgg                                   |                                                       |
| SaCas9-F    | gacatgccatgggaaacggaactacatcctg                                     | pH5-SaCas9<br>(ligation)                              |
| SaCas9-R    | gaacgcgtcgactactgtcatcgtcatcctg                                     |                                                       |
| AsCpf1-F    | gttcgaggatcc atgacacagttcgagggtttac                                 | pH5-As(Lb)<br>Cpf1 (ligation)                         |
| LbCpf1-F    | gttcgaggatcc atgagcaagctggagaagttaacaactg                           |                                                       |
| Cpf1-R      | caccgctcgag tca cttttctttttgacctggcc                                |                                                       |
| SgH-F       | ccactacgtgctcgagtctttgaaaagataatg                                   | pSgH (ligation)                                       |
| SgH-R       | Gcagggagctcagacataaaaaacaaaaaa<br>ggagacctcggctccgatcatttatcttactgc |                                                       |
| SpSgH-F     | ctccgcagtgaagataaatgatcggagaccgaggtctccggttttagagctagaaatagc        | pSpSgH<br>(ligation)                                  |
| SpSgH-R     | cagacataaaaaacaaaaaa ggatcaaaaaagcaccgactcgggtg                     |                                                       |
| NmSgH-F     | ctccgcagtgaagataaatgatcggagaccgaggtctccggttagctccctttctcat          | pNmSgH<br>(ligation)                                  |
| NmSgH-R     | cagacataaaaaacaaaaaa ggatcaaaacgatgcccttaaaagc                      |                                                       |
| St1SgH-F    | ctccgcagtgaagataaatgatcggagaccgaggtctccggtttgtactctcagaat           | pSt1SgH<br>(ligation)                                 |
| St1SgH-R    | cagacataaaaaacaaaaaa ggatcaaaaaaacacctgccataaaatg                   |                                                       |
| SaSgH-F     | ctccgcagtgaagataaatgatcggagaccgaggtctccggttttagtactctgtaatt         | pSaSgH<br>(ligation)                                  |
| SaSgH-R     | cagacataaaaaacaaaaaa ggatcaaaaaaatctcgccaacaag                      |                                                       |
| NLS-BamHI-F | gatccatgcctcaaaaaagaagagaaggtcggtagtggtctg                          | Insert N-<br>terminal NLS<br>at BamHI or<br>NcoI site |
| NLS-BamHI-R | gatccagaaccactaccgacctttctctttttggaggcatg                           |                                                       |
| NLS-NcoI-F  | catgggacctcaaaaaagaagagaaggtcggtagtggtcttc                          |                                                       |
| NLS-NcoI-R  | catggaagaaccactaccgacctttctctttttggagggcc                           |                                                       |
| ADE2-KO-F   | atggattctagaacagttggtatattaggagggggacaatttcgtacgctcaggtcgac         | linear donor for<br>ADE2 deletion                     |
| ADE2-KO-R   | ttactgttttctagataagctcgtaccgacagtttctgcataggccactagtgatc            |                                                       |
| Csy4-F      | gttggagatctatg ggtgatcattatctggatattc                               | pH3-Csy4<br>(ligation)                                |
| Csy4-R      | caccgctcgag tta aaaccagggcacgaaac                                   |                                                       |
| dCas9-AD-F  | actttttacaacaataataaaacaGatggactacaagaccatgacggtg                   | pH6-dSp/St1-<br>Cas9-<br>V/VP/VPR<br>(Gibson)         |
| dCas9-V-R   | gaattaataaaaagtgttcgcaaggatctcagcaaggctgagaaatccatatac              |                                                       |
| dCas9-VP-R  | gaattaataaaaagtgttcgcaaggatctcataacatcagatcgaatc                    |                                                       |
| dCas9-VPR-R | gaattaataaaaagtgttcgcaaggatctcaagaagcgtatgccggaacgtc                |                                                       |

|               |                                                           |                                                                                     |
|---------------|-----------------------------------------------------------|-------------------------------------------------------------------------------------|
| dSaCas9-AD-F  | actttttacaacaataataaaacagatggccccaagaagaagcggaag          | pH6-dSaCas9-V/VP/VPR (Gibson)                                                       |
| dSaCas9-V-R   | gaattaataaaaagtgttcgcaaaggatccagcatgtccaggtcgaaatcatcaag  |                                                                                     |
| dSaCas9-VPR-R | gaattaataaaaagtgttcgcaaaggatctcaaaacagagatgtgtcgaagatg    |                                                                                     |
| dLbCpf1-F1    | cgccaccatggct cctccaaaaagaagagaaaag                       | dLbCpf1 OE-PCR                                                                      |
| dLbCpf1-R1    | caccacgatatacagcagattgcgctcgcgccctagcgcgatcccataggggttacc |                                                                                     |
| dLbCpf1-F2    | ctgaagcacgacgataaccctatgtgatcggcatcgctaggggagcgcgaatctgtg |                                                                                     |
| dLbCpf1-R2    | cgccgaagcttcttttcttttgcctggccgg                           |                                                                                     |
| RD1-F         | agttccaagcttggcggcagcggcggcagc atgactgccagcgttccgaatac    | Amplification of RD1/RD2/RD3/RD4                                                    |
| RD1-R         | caccgctcgag tta aggtggttctgtgttgaagtg                     |                                                                                     |
| RD2-F         | agttccaagcttggcggcagcggcggcagc tacgaagaagagatcaagcac      |                                                                                     |
| RD2-R         | caccgctcgag tta cgcaactggaacagatgcagatg                   |                                                                                     |
| RD3-F         | agttccaagcttggcggcagcggcggcagc gctagtgtgcaccaggatcac      |                                                                                     |
| RD3-R         | caccgctcgag tta agattgtgtaactcaacgctc                     |                                                                                     |
| RD5-F         | agttccaagcttggcggcagcggcggcagc gattcacaagtcaagaactg       | Amplification of RD5/RD6                                                            |
| RD5-R         | caccgctcgag tcagtccatgtgtggaaggg                          |                                                                                     |
| RD6-F         | agttccaagcttggcggcagcggcggcagc actagtgttacgaatttgcac      |                                                                                     |
| RD6-R         | Same as RD5-R                                             |                                                                                     |
| RD7-F         | agttccaagcttggcggcagcggcggcagc atggtaatctcaagaacg         | Amplification of RD7/RD8/RD9                                                        |
| RD7-R         | caccgctcgag tta gataagtggcgtaaatattg                      |                                                                                     |
| RD8-F         | Same as RD7-F                                             |                                                                                     |
| RD8-R         | caccgctcgag tta agattgttattttctgcaattt                    |                                                                                     |
| RD9-F         | agttccaagcttggcggcagcggcggcagc ttctgtcaagtttctgaacaaag    |                                                                                     |
| RD9-R         | caccgctcgag ttaaacttttagccattgac                          |                                                                                     |
| RD10-F        | agttccaagcttggcggcagcggcggcagc tgtgtagtgaacttgcacaaac     | Amplification of RD10                                                               |
| RD10-R        | caccgctcgag tta atcaccggaggtatctcaaccg                    | Amplification of RD11                                                               |
| RD11-F        | agttccaagcttggcggcagcggcggcagc aattctgcattctcatctac       |                                                                                     |
| RD11-R        | caccgctcgag tta ttagaattgttcttgcgaaatg                    | Insert RD2 and RD5 at N-terminus                                                    |
| N-RD-F        | cgccaccatggct cccaagaaaaagcgcaaggtag                      |                                                                                     |
| N-RD2-R       | gaggagccatggacgcaactggaacagatgcagatg                      |                                                                                     |
| N-RD5-R       | gaggagccatggagtccatgtgtgggaagggcaacg                      |                                                                                     |
| 3gRNA-F1      | nnnnnggtctccggactctttgaaaagataatgtatg                     |                                                                                     |
| 3gRNA-R1      | nnnnnggtctccggacttgcctgcctgcaggagctc                      |                                                                                     |
| 3gRNA-F2      | nnnnnggtctcctcctctttgaaaagataatgtatg                      |                                                                                     |
| 3gRNA-R2      | nnnnnggtctccttggcttgcctgcctgcaggagctc                     |                                                                                     |
| 3gRNA-F3      | nnnnnggtctcccagctttgaaaagataatgtatg                       |                                                                                     |
| 3gRNA-R3      | nnnnnggtctcccacttgcctgcctgcaggagctc                       |                                                                                     |
| ReFu-F1       | ggttgagtgttccagtttgaacaagagtc                             | Assemble CRISPR protein cassettes and Csy4 cassette into a single plasmid using DNA |
| ReFu-R1N      | catgccggtagaggtgtgtgcaataagag                             |                                                                                     |
| ReFu-F2N      | agcttggactcttcgccagaggtttg                                |                                                                                     |
| ReFu-R2N      | gcttggtgccacttgcacatacaattc                               |                                                                                     |
| ReFu-F3       | cctgcagggtgtcgacgctgcgggtatagaaag                         |                                                                                     |
| ReFu-R3       | ctgccctttatattccctgttacagcagccgagc                        |                                                                                     |
| ReFu-F4       | gcggccgctatatctaggaaccatcaggtt                            |                                                                                     |
| ReFu-R4       | gattgctatgcttcttctaatgagcaagaag                           |                                                                                     |

|             |                                                                   |                                                          |                                         |
|-------------|-------------------------------------------------------------------|----------------------------------------------------------|-----------------------------------------|
| ReFu-F5     | ccgcggatagcttcaaatgtttctactc                                      | assembler                                                |                                         |
| ReFu-R5     | gggttcgccacctctgacttgagcgtc                                       |                                                          |                                         |
| SpMS2H-R    | cagacataaaaaacaaaaaa ggatc ggaagactccccagtactg                    | pSpMS2SgH                                                |                                         |
| SpPP7H-R    | cagacataaaaaacaaaaaa ggatc ggaactgctgcgtaagggttc                  | pSpPP7SgH                                                |                                         |
| SpComH-R    | cagacataaaaaacaaaaaa ggatc<br>gatgctcgcaggcattcaggcaccgactcgggtgc | pSpComSgH                                                |                                         |
| PCP-MXI1-F1 | gttcgcggatcc atgccaaaaagaaaagaaaagtg                              | pH1-PCP-<br>MXI1 (ligation)                              |                                         |
| PCP-MXI1-R1 | tcttgggagctccctc ggagccacggcccagcg                                |                                                          |                                         |
| MCP-VP64-F  | gttggaaatct atgccaaaaagaaaagaaaagtg                               | pH4-MCP-<br>VP64 (ligation)                              |                                         |
| MCP-VP64-R  | caccgctcag tcagttgatgagcatgtccagatc                               |                                                          |                                         |
| ROX1-Conf-F | tattctgttcagacagggacc                                             | Verification<br>and sequencing<br>primers for<br>CRISPRd |                                         |
| ROX1-Conf-R | gatagctgttcgagcttgacac                                            |                                                          |                                         |
| PMR1-Conf-F | catctaacgaggccaacaatag                                            |                                                          |                                         |
| PMR1-Conf-R | atataagctatacaagaggctg                                            |                                                          |                                         |
| PEP4-conf-F | cgatcatgaagcttcatcaagc                                            |                                                          |                                         |
| PEP4-conf-R | ctctcaattcggcgacttgac                                             |                                                          |                                         |
| VPS8-conf-F | acgagaccgaaatataagtg                                              |                                                          |                                         |
| VPS8-conf-R | caggagaatggctagcggactg                                            |                                                          |                                         |
| YPS1-conf-F | cgacttgaacgtaccgggttg                                             |                                                          |                                         |
| YPS1-conf-R | tcagatggacagtccattgcgc                                            |                                                          |                                         |
| qHMG1-F     | agaagtggacggtgatttgag                                             |                                                          | Quantitative<br>PCR analysis<br>primers |
| qHMG1-R     | catggcaccttgggttcta                                               |                                                          |                                         |
| qERG9-F     | cttctggccaaggaaatct                                               |                                                          |                                         |
| qERG9-R     | gacgaggtggttatacagtcc                                             |                                                          |                                         |
| qPDI1-F     | gtcaacgacccaagaagga                                               |                                                          |                                         |
| qPDI1-R     | tggcgtaggtatcagctagt                                              |                                                          |                                         |
| qMNN9-F     | ggagaaggaaagacacgcttta                                            |                                                          |                                         |
| qMNN9-R     | ccaagaagtgtgaggtcctatg                                            |                                                          |                                         |
| qERO1-F     | ttgctctgttgatgctgtagag                                            |                                                          |                                         |
| qERO1-R     | tcacccgttccttcattgtat                                             |                                                          |                                         |
| qPMR1-F     | cccttagcggttgctgctatt                                             |                                                          |                                         |
| qPMR1-R     | accttctcacgatggctttac                                             |                                                          |                                         |
| qALG9-F     | ccgttgccatgttggtagt                                               |                                                          |                                         |
| qALG9-R     | gccaggaaattgtacgctaac                                             |                                                          |                                         |



**Supplementary Table 9 | Oligos used to construct gRNAs.**

| Oligos  | Sequences (5'-3')           |
|---------|-----------------------------|
| pSg1-F  | gatcttgatatttaagttattaaa    |
| pSg1-R  | aaactttaataacttaaatatcaa    |
| pSg6-F  | gatc actttagtgctgacacatac   |
| pSg6-R  | aaac gtatgtgtcagcactaaagt   |
| pSg10-F | gatc gatatcaagaggattggaaa   |
| pSg10-R | aaactttccaatcctcttgatc      |
| pSg12-F | gatc acgtccctattgaatgttgg   |
| pSg12-R | caaccaacattcaataggacgt      |
| pSg13-F | gatc aactctggacattataccat   |
| pSg13-R | caacatggtataatgtccagagtt    |
| pSg14-F | gatc aaaaatgggcaccatttact   |
| pSg14-R | aaacagtaaatggtgccattttt     |
| pSg15-F | gatc ccaattgtagagactatcca   |
| pSg15-R | aaactggatagctctacaattgg     |
| pSg27-F | gatc ttaaagttattaaa         |
| pSg27-R | aaactttaataacttaaa          |
| pSg28-F | gatc taatatcaatggg          |
| pSg28-R | aaac cccattgatattta         |
| pSg29-F | gatc gaagctcatttgagatcaat   |
| pSg29-R | caac atfgatctcaaatgagcttc   |
| pSg30-F | gatc ggaagaggtaacttcgttgt   |
| pSg30-R | aaac acaacgaagttacctctcc    |
| pSg31-F | gatc gcaagcatcaatgtataatgct |
| pSg31-R | aaacgacattataccattgatgcttgc |
| pSg32-F | gatcgttaacttcgttgaagaataagg |
| pSg32-R | caaccctattctttacaacgaagttac |
| pSg33-F | gategtgctgacacatac          |
| pSg33-R | aaacgtatgtgtcagcac          |
| pSg35-F | gatc gatatttaagttattaaa     |
| pSg35-R | ttaataacttaaatc             |
| pSg36-F | gatc tatttaagttattaaa       |
| pSg36-R | aaac ttaataacttaata         |
| pSg37-F | gatc atttaagttattaaa        |
| pSg37-R | aaac ttaataacttaaat         |
| pSg38-F | gatc ttaagttattaaa          |
| pSg38-R | aaac ttaataacttaa           |
| pSg39-F | gatc taagttattaaa           |
| pSg39-R | aaac ttaataactta            |
| pSg40-F | gatc agttattaaa             |
| pSg40-R | aaac ttaataact              |
| pSg55-F | gatc gaaaaaagtagcta         |
| pSg55-R | aaac tagctacttttttc         |
| pSg56-F | gatc cegtaccataccct         |
| pSg56-R | aaac agggatgtgtacgg         |
| pSg64-F | gatc ggatagctctacaattggg    |
| pSg64-R | aaac cccaattgtagagactatcc   |

|          |                                                |
|----------|------------------------------------------------|
| pSg65-F  | gatctccgccagcgtgtatatatagc                     |
| pSg65-R  | aaacgctatatatacacgcctggcgga                    |
| pSg66-F  | gatcaacgaagcaggaaatgagagaat                    |
| pSg66-R  | aaacattctctcatttctgcttcggt                     |
| pSg68-F  | gatctaatttctactctttagatgatcaagaggattggaaaagg   |
| pSg68-R  | aaaacctttccaatcctcttgatatcatctacaagagtagaaatta |
| pSg69-F  | gatcaatttctactaagttagatgatcaagaggattggaaaagg   |
| pSg69-R  | aaaacctttccaatcctcttgatatcatctacacttagtagaaatt |
| pSg87-F  | gatccgaagcaggaaatgagagaat                      |
| pSg87-R  | aaacattctctcatttctgcttcg                       |
| pSg88-F  | gatccttcggtcatttcgagttcc                       |
| pSg88-R  | aaacggaaactcgaatgaacgaag                       |
| pSg89-F  | gatccagacctccctgcgagcggggc                     |
| pSg89-R  | aaacgcccgtcgcaggagggtctg                       |
| pSg90-F  | gatccgccagcgtgtatatatagc                       |
| pSg90-R  | aaacgctatatatacacgcctggcg                      |
| pSg91-F  | gatctcatttggcgagcgttggttg                      |
| pSg91-R  | aaaccaaccaacgctcgccaaatga                      |
| pSg92-F  | gatcgatcttccggtctcttggc                        |
| pSg92-R  | aaacgccaagagaccggaaagatc                       |
| pSg93-F  | gatcggcttgtccacaggaact                         |
| pSg93-R  | aaacagtgctctgtggaacaagcc                       |
| pSg94-F  | gatcgccaaagtcctcgactcaag                       |
| pSg94-R  | aaaccttgaagtcgaggactttggc                      |
| pSg95-F  | gatcacaacttcgcttaagttaa                        |
| pSg95-R  | aaactcaactaaggcgaagttgt                        |
| pSg109-F | gatctctaagtttaattacaaaa                        |
| pSg109-R | aaacttttgaattaaaacttaga                        |
| pSg110-F | gatcggaatcgtgagcaagggcg                        |
| pSg110-R | aaaccgcccttgctcacgaattcc                       |
| pSg111-F | gatccgaggagctgttcaccgggg                       |
| pSg111-R | aaacccccggtgaacagctcctcg                       |
| pSg112-F | gatcgaccaggatgggcaccaccc                       |
| pSg112-R | aaacgggtggtgcccatcctggtc                       |
| pSg113-F | gatccgtcgccgtccagctcgacc                       |
| pSg113-R | aaacggtcgagctggacggcgacg                       |
| pSg114-F | gatcgggtggtgcagatcagcttca                      |
| pSg114-R | aaactgaagctgatctgcaccacc                       |
| pSg115-F | gatccaagtaatacatattcaaaa                       |
| pSg115-R | aaacttttgaatatgtattacttg                       |
| pSg116-F | gatcgaatatgtattacttggtta                       |
| pSg116-R | aaactaaccaagtaatacatattc                       |

|          |                                                   |
|----------|---------------------------------------------------|
| pSg117-F | gatcaagaacagaagaataacgca                          |
| pSg117-R | aaactgcgttattctctgttctt                           |
| pSg118-F | gatcttatccctcatgttgctaa                           |
| pSg118-R | aaacttagacaacatgagggataa                          |
| pSg119-F | gatccaatcaatacaataaaataa                          |
| pSg119-R | aaactattttattgtattgattg                           |
| pSg120-F | gatctactctttgaaacaagatgt                          |
| pSg120-R | aaacacatcttgtcaaaagagta                           |
| pSg121-F | gatcataagtatattaggatgagg                          |
| pSg121-R | aaaccctcctcaatatacttat                            |
| pSg122-F | gatcaatttctactaagttagat gtgtaggaacatcaacatgctca   |
| pSg122-R | aaaatgagcatgttgatgttcctacac atctacacttagtagaaatt  |
| pSg123-F | gatcaatttctactaagttagat cccttctccagaacaacatcagat  |
| pSg123-R | aaaaatctgattgtttctggagaaggg atctacacttagtagaaatt  |
| pSg124-F | gatcaatttctactaagttagat ccattcgtcttgaagtcgaggac   |
| pSg124-R | aaaagtcctcgactcaagacgaatgg atctacacttagtagaaatt   |
| pSg125-F | gatcaatttctactaagttagat agttattaatggcttcaattt     |
| pSg125-R | aaaa aaattgaagaccatttaataact atctacacttagtagaaatt |
| pSg126-F | gatcaatttctactaagttagat ataacttaaatatcaatgggagg   |
| pSg126-R | aaaa cctcccattgatatttaagtat atctacacttagtagaaatt  |
| pSg127-F | gatcaatgaacgaagcaggaaatg                          |
| pSg127-R | aaaccatttctcgtctcgttcatt                          |
| pSg128-F | gatcgcgtgtgttgctgctgaca                           |
| pSg128-R | aaactgtcagcagcaacaacacgc                          |
| pSg135-F | gatcaatttctactaagttagat cttcttgctcattagaagaaag    |
| pSg135-R | aaaa ctttcttctaagcaagaag atctacacttagtagaaatt     |
| pSg136-F | gatcaatttctactaagttagat taattaaacttagattagattg    |
| pSg136-R | aaaa caatctaactaagtttaatta atctacacttagtagaaatt   |
| pSg137-F | gatcaatttctactaagttagat cgtcgcctccagctcgaccagg    |
| pSg137-R | aaaa cctggctgagctggacggcgacg atctacacttagtagaaatt |
| pSg138-F | gatcttcttagcaagcaaaagga                           |
| pSg138-R | aaactcctttgcttgctaagaaa                           |
| pSg139-F | gatcggaactcgaaatgaacgaa                           |
| pSg139-R | aaactcgttcatttcagtttcc                            |
| pSg140-F | gatccttagcaaaagcaaggagg                           |
| pSg140-R | aaaccctcctttgcttgctaag                            |
| pSg141-F | gatcatagcggtagtgtttgcgcg                          |
| pSg141-R | aaaccgcgcaaacactaccgctat                          |
| pSg142-F | gatcgtaaaccccgccaagaga                            |
| pSg142-R | aaactctctttggccggggtttac                          |
| pSg143-F | gatcacacgcctggcggatctgct                          |
| pSg143-R | aaacagcagatccgaggcgtgt                            |

|          |                                                    |
|----------|----------------------------------------------------|
| pSg144-F | gatcacctgaatctaaaattcccg                           |
| pSg144-R | aaaccgggaattttagattcaggt                           |
| pSg146-F | gatcgccggggtttacggacgatg                           |
| pSg146-R | aaaccatcgtccgtaaaccgcc                             |
| pSg147-F | gatcgacggaaaaagtagctaag                            |
| pSg147-R | aaaccttagctactttttccgctc                           |
| pSg148-F | gatccaaagcattcaattcaaatg                           |
| pSg148-R | aaaccatttgaattgaatgctttg                           |
| pSg149-F | gatcaatttctactaagtgtagat caagggtatggtacgggtctatc   |
| pSg149-R | aaaa gatagcaccgtaccatacccttg atctacacttagtagaaatt  |
| pSg150-F | gatcaatttctactaagtgtagat tcagcagcaacaacacgctacgc   |
| pSg150-R | aaaa gcgtagcgtgttgttctgctga atctacacttagtagaaatt   |
| Sg155-F  | gatcaatttctactaagtgtagat cggacgatggcagaagaccaaaag  |
| Sg155-R  | aaaa ctttggcttctgccatcgtccg atctacacttagtagaaatt   |
| Sg156-F  | gatcaatttctactaagtgtagat gcgagcgttgggttgatcaa      |
| Sg156-R  | aaaa ttgatccaccaaccaacgctcgc atctacacttagtagaaatt  |
| Sg157-F  | gatcaatttctactaagtgtagat gtgctgacacatacaggcatata   |
| Sg157-R  | aaaa tatatgcctgtatgtgctcagcac atctacacttagtagaaatt |
| pSg172-F | gatcataaatggaagttaggaca                            |
| pSg172-R | aaactgtcctaactttccatttat                           |
| pSg175-F | gatcaatttctactaagtgtagatcggctatgaaaagctgttctcg     |
| pSg175-R | aaaacgaacaacagctttcatagccgatctacacttagtagaaatt     |
| pSg194-F | gatcaatttctactaagtgtagatcatattcgaagcttacaatcgag    |
| pSg194-R | aaaactcgattgtaagcttcgaatgatctacacttagtagaaatt      |
| pSg195-F | gatcaatttctactaagtgtagattaccagcaatcagctgactaaca    |
| pSg195-R | aaaatgttagtcagctgattgctgtaatctacacttagtagaaatt     |
| pSg196-F | gatcaatttctactaagtgtagattgctcttaccgactctgaaga      |
| pSg196-R | aaaatcttcagagtcgggtaagagcaaatctacacttagtagaaatt    |
| pSg197-F | gatcaatttctactaagtgtagatgcaagacctcaacaatcgtact     |
| pSg197-R | aaaaagtagcattgtttgaggcttgcactacacttagtagaaatt      |
| pSg198-F | gatcgctggggtagaactagagta                           |
| pSg198-R | aaactactctagtctacccagc                             |
| pSg199-F | gatcttatatgacagttcaaaaga                           |
| pSg199-R | aaactctttgaactgtcatataa                            |
| pSg200-F | gatcggaagtggagatggaagagg                           |
| pSg200-R | aaaccctcttccatctccactcc                            |
| pSg201-F | gatcctacatgcaaacgacaata                            |
| pSg201-R | aaactattgtcgtttgcatgtag                            |
| pSg202-F | gatcgctgaaaactgtatgtcggg                           |
| pSg202-R | aaaccgcacatacagttttcagc                            |
| pSg203-F | gatcatccaacgatgcaattcagt                           |
| pSg203-R | aaactgaattgcatcgttgat                              |

|          |                                                   |
|----------|---------------------------------------------------|
| pSg204-F | gatcaaatgggaatggaaagaacg                          |
| pSg204-R | aaaccgtctttccattcccattt                           |
| pSg217-F | gatcaatttctactaagtgtagatcaacaactatctgcgataactca   |
| pSg217-R | aaaatgagttatcgcagatagttggtgatctacacttagtagaaatt   |
| pSg218-F | gatcaatttctactaagtgtagatcagggtcttataagagaacc      |
| pSg218-R | aaaaggtttctcttatagaagaccctgatctacacttagtagaaatt   |
| pSg219-F | gatcaatttctactaagtgtagatagccctacttaagtctgagccac   |
| pSg219-R | aaaagtggtcagcattaagtagggctatctacacttagtagaaatt    |
| pSg220-F | gatcaatttctactaagtgtagatgctatgtagctgcaactttcta    |
| pSg220-R | aaaatagaaagttgcagctaacatagcatctacacttagtagaaatt   |
| pSg221-F | gatcaatttctactaagtgtagatgaaacacgtgctctgaaaattat   |
| pSg221-R | aaaaataattttcaggacacgtgttcatctacacttagtagaaatt    |
| pSg222-F | gatcaatttctactaagtgtagataaaatcatcgaatagccgatcga   |
| pSg222-R | aaaatc gatcggctattc gatgattttatctacacttagtagaaatt |
| pSg223-F | gatcaatttctactaagtgtagatccagtcactatcatcatcatcat   |
| pSg223-R | aaaaatgatgatgatgatagtgactggatctacacttagtagaaatt   |
| pSg224-F | gatcaatttctactaagtgtagatagggcaaaaactggattctccc    |
| pSg224-R | aaaagggagaatccagttttgcccgtatctacacttagtagaaatt    |
| pSg225-F | gatcaatttctactaagtgtagattgtcttacgagccgggtaccaag   |
| pSg225-R | aaaacttggtaccggctcgtagacaactctacacttagtagaaatt    |
| pSg226-F | gatcaatttctactaagtgtagatcaggggcgatgccacttatcagt   |
| pSg226-R | aaaaactgataagtgatcgcgccctgatctacacttagtagaaatt    |
| pSg227-F | gatcggattggcgagaataatgt                           |
| pSg227-R | aaacacattatttctcgccaatcc                          |
| pSg228-F | gatcgcagatggggagagagaatg                          |
| pSg228-R | aaaccattctctcctccatctgc                           |
| pSg229-F | gatctttcctgtgagcatcaggt                           |
| pSg229-R | aaacacctgatcgtacaaggaaa                           |
| pSg230-F | gatcgaataacgggtccaagag                            |
| pSg230-R | aaacctctgggaccegttatttc                           |
| pSg231-F | gatccccacgggttctttcttagg                          |
| pSg231-R | aaaccctaagaagaaccgtggg                            |
| pSg260-F | gatcgcgagcaaacactattatga                          |
| pSg260-R | aaactcataatagtttgctcgc                            |
| pSg261-F | gatcagaagggttggtttcgaaa                           |
| pSg261-R | aaactttcgaaaccaagcccttct                          |
| pSg262-F | gatccaaaacgggatatttaagcc                          |
| pSg262-R | aaacggcttaaatatcccgttttg                          |
| pSg263-F | gatcagccgaatgaatgaaatag                           |
| pSg263-R | aaaccatatttcattcctggct                            |
| pSg264-F | gatcttgttgatgatacaagag                            |
| pSg264-R | aaacctctgtatcatcacaacaa                           |

**Supplementary Table 10 | gBLOCKs used in this study.**

|       | Sequences                                                                                                                                                                                                                                                                                                                                                                                                                                                                                               |
|-------|---------------------------------------------------------------------------------------------------------------------------------------------------------------------------------------------------------------------------------------------------------------------------------------------------------------------------------------------------------------------------------------------------------------------------------------------------------------------------------------------------------|
| Sg10  | ctttggtctccgatc<br>aaattctctgccaacaataagcaactccaatgaccacgtaaatggct<br>aatcctcttgatcgaactagctgaaaatgtgatgtgtaacgat<br><u>gatatcaagaggattgaaa</u><br>gtttgagaccttc                                                                                                                                                                                                                                                                                                                                        |
| Sg145 | ctttggtctccgatc<br>tccacaaggacaatattgtgacttatgttatgctgcttagagtccg<br>ggcagaaaatgcaatcaaatctttcccgggtgtgatatgtgtgg<br><u>acaactcgccttaagttaa</u><br>gtttgagaccttc                                                                                                                                                                                                                                                                                                                                        |
| Sg163 | gttcgcgatcc <b>gttactgccgtataggcag</b> AATTTCTACTAAGTGTAGAT <u>gagagcgttggttggtgatcaa</u><br><b>gttactgccgtataggcag</b> gaccaggatggcaccaccGTTTTAGAGCTAGAAATAGCAAGTTAAAA<br>TAAGGCTAGTCCGTTATCAACTTGAAAAAGTGGCACCGAGTCGGTGC<br><b>gttactgccgtataggcag</b> tccacaaggacaatattgtgacttatgttatgctgcttagagtccggcagaaaatgcaatcaaat<br>ctttcccgggtgtgatatattgtgtggacaactcgccttaagttaaGTTTTAGTACTCTGGAAACAGAATC<br>TACTAAAACAAGGCAAAATGCCGTGTTTATCTCGTCAACTTGTTGGCGAGA<br><b>gttactgccgtataggcag</b> ctcgagcgggtg |
| Sg186 | ctttggtctccgatc<br>ctacacctaagattccaagaccaagaacgcatttattctgttcagacag<br>ggaccgctcaaggtgtgaaatacccataattcaaacatttctaaatt<br><u>actaccacaggatcttaatag</u><br>gtttgagaccttc                                                                                                                                                                                                                                                                                                                                |
| Sg205 | ctttggtctccgatc<br>tacataaaacctcacaacgatcgaaaaatctccttaacgatcagcct<br>cttgatagcttatatgggtacattagtaaggaaggtcatgtaagggt<br><u>atctctcagaaatcgtacaa</u><br>gtttgagaccttc                                                                                                                                                                                                                                                                                                                                   |
| Sg265 | ctttggtctccgatc<br>cgatatacttggtacctgttcgtcgaaggcttactgggaagtcaagt<br>cgccgaattggagagccatggtgccccatcgatactggtactctttga<br><u>ttgaaggatcggtttagcgc</u><br>gtttgagaccttc                                                                                                                                                                                                                                                                                                                                  |
| Sg266 | ctttggtctccgatc<br>catatgtccgatggtactcatgtagctgcctcaccagaccgaaata<br>tagagtgaaccacttctgaaccaaaaatggtatgacccaacgcctg<br><u>tatgcatttgaacttgaacg</u><br>gtttgagaccttc                                                                                                                                                                                                                                                                                                                                     |
| Sg267 | ctttggtctccgatc<br>ttcgcacctagtctagtagcgcatacttaccactggttgaggtaaat<br>accacaaaatcgaacactattccatactatcatcagatggacagtcca<br><u>atacgaataacctatcctgg</u><br>gtttgagaccttc                                                                                                                                                                                                                                                                                                                                  |

The gRNA targeting sequences were underlined, the gRNA scaffold sequences were shown in uppercase, and the Csy4 sites were shown in red.

**Supplementary Table 11 | Yeast strains used in this study.**

| Strains    | Genotype                                                                                                                  |
|------------|---------------------------------------------------------------------------------------------------------------------------|
| CEN.PK2-1C | <i>MATa; his3D1; leu2-3_112; ura3-52; trp1-289; MAL2-8c; SUC2</i>                                                         |
| CEN-iAID6  | <i>CEN.PK2-1C-KanMX-TDH3p-dLbCpf1-VP64-p65-ADH1t-ENO2p-Csy4-PGK1t-TPI1p-dSpCas9-RD11-RD5-RD2-TPI1t-TEF1p-SaCas9-TEF1t</i> |
| CT         | <i>CEN.PK2-1C-ura3::URA3-CYC1p-mCherry-TEF1t-TEF1p-mVenus-PGK1t</i>                                                       |
| CF         | <i>CEN.PK2-1C-ura3::URA3-CYC1p-mCherry-TEF1t-FBA1p-mVenus-PGK1t</i>                                                       |
| CH         | <i>CEN.PK2-1C-ura3::URA3-CYC1p-mCherry-TEF1t-HHF2p-mVenus-PGK1t</i>                                                       |
| CR1        | <i>CEN.PK2-1C-ura3::URA3-CYC1p-mCherry-TEF1t-REV1p-mVenus-PGK1t</i>                                                       |
| CR2        | <i>CEN.PK2-1C-ura3::URA3-CYC1p-mCherry-TEF1t-RNR2p-mVenus-PGK1t</i>                                                       |
| CEN-Crt    | <i>CEN-iAID6-ura3::URA3-TDH3p-CrtYB-CYC1t-TDH3p-CrtE-CYC1t-TDH3p-CrtI-CYC1t</i>                                           |
| CEN-EGII   | <i>CEN-iAID6-ura3::URA3-TEF1p-prepro-HisTag-EGII-AGA1-PGK1t</i>                                                           |

## Supplementary References

1. Edmondson, D. G., Smith, M. M. & Roth, S. Y. Repression domain of the yeast global repressor Tup1 interacts directly with histones H3 and H4. *Genes Dev.* **10**, 1247-1259 (1996).
2. Ostling, J., Carlberg, M. & Ronne, H. Functional domains in the Mig1 repressor. *Mol. Cell. Biol.* **16**, 753-761 (1996).
3. Zhang, Z. & Reese, J. C. Molecular genetic analysis of the yeast repressor Rfx1/Crt1 reveals a novel two-step regulatory mechanism. *Mol. Cell. Biol.* **25**, 7399-7411 (2005).
4. Traven, A., Staresinic, L., Arneric, M. & Sopta, M. The yeast protein Xtc1 functions as a direct transcriptional repressor. *Nucleic Acids Res.* **30**, 2358-2364 (2002).
5. Kadosh, D. & Struhl, K. Repression by Ume6 involves recruitment of a complex containing Sin3 corepressor and Rpd3 histone deacetylase to target promoters. *Cell* **89**, 365-371 (1997).
6. Liu, L., Zhang, Y., Liu, Z., Petranovic, D. & Nielsen, J. Improving heterologous protein secretion at aerobic conditions by activating hypoxia-induced genes in *Saccharomyces cerevisiae*. *FEMS Yeast Res.* **15** (2015).
7. Zhang, B., Chang, A., Kjeldsen, T. B. & Arvan, P. Intracellular retention of newly synthesized insulin in yeast is caused by endoproteolytic processing in the Golgi complex. *J. Cell Biol.* **153**, 1187-1198 (2001).
8. Wentz, A. E. & Shusta, E. V. A novel high-throughput screen reveals yeast genes that increase secretion of heterologous proteins. *Appl. Environ. Microbiol.* **73**, 1189-1198 (2007).
9. Hou, J., Tyo, K. E., Liu, Z., Petranovic, D. & Nielsen, J. Metabolic engineering of recombinant protein secretion by *Saccharomyces cerevisiae*. *FEMS Yeast Res.* **12**, 491-510 (2012).
10. Valkonen, M., Penttila, M. & Saloheimo, M. Effects of inactivation and constitutive expression of the unfolded- protein response pathway on protein production in the yeast *Saccharomyces cerevisiae*. *Appl. Environ. Microbiol.* **69**, 2065-2072 (2003).
11. Becerra, M., Díaz Prado, S., Cerdán, E. & González Siso, M. I. Heterologous *Kluyveromyces lactis*  $\beta$ -galactosidase secretion by *Saccharomyces cerevisiae* super-secreting mutants. *Biotechnol. Lett.* **23**, 33-40 (2001).
12. Smith, J. D., Tang, B. C. & Robinson, A. S. Protein disulfide isomerase, but not binding protein, overexpression enhances secretion of a non-disulfide-bonded protein in yeast. *Biotechnol. Bioeng.* **85**, 340-350 (2004).
13. Tang, H. *et al.* N-hypermannose glycosylation disruption enhances recombinant protein production by regulating secretory pathway and cell wall integrity in *Saccharomyces cerevisiae*. *Sci. Rep.* **6**, 25654 (2016).
14. Hou, J., Tyo, K., Liu, Z., Petranovic, D. & Nielsen, J. Engineering of vesicle trafficking improves heterologous protein secretion in *Saccharomyces cerevisiae*. *Metab. Eng.* **14**, 120-127 (2012).
15. Larsson, S., Cassland, P. & Jonsson, L. J. Development of a *Saccharomyces cerevisiae* strain with enhanced resistance to phenolic fermentation inhibitors in lignocellulose hydrolysates by heterologous expression of laccase. *Appl. Environ. Microbiol.* **67**, 1163-1170 (2001).
16. Chen, Y., Pioli, D. & Piper, P. W. Overexpression of the gene for polyubiquitin in yeast confers increased secretion of a human leucocyte protease inhibitor. *Biotechnology (N Y)* **12**, 819-823 (1994).
17. Lian, J. & Zhao, H. Reversal of the  $\beta$ -oxidation cycle in *Saccharomyces cerevisiae* for production of fuels and chemicals. *ACS Synth. Biol.* **4**, 332-341 (2015).
18. Lian, J. & Zhao, H. Functional reconstitution of a pyruvate dehydrogenase in the cytosol of *Saccharomyces cerevisiae* through lipoylation machinery engineering. *ACS Synth. Biol.* **5**, 689-697 (2016).
19. Du, J., Yuan, Y., Si, T., Lian, J. & Zhao, H. Customized optimization of metabolic pathways by combinatorial transcriptional engineering. *Nucleic Acids Res.* **40**, e142 (2012).
20. Bao, Z., Jain, S., Jaroenpuntaruk, V. & Zhao, H. Orthogonal genetic regulation in human cells using chemically induced CRISPR/Cas9 activators. *ACS Synth. Biol.* (2017).



21. Chavez, A. *et al.* Highly efficient Cas9-mediated transcriptional programming. *Nat. Methods* **12**, 326-328 (2015).
22. Kiani, S. *et al.* Cas9 gRNA engineering for genome editing, activation and repression. *Nat. Methods* **12**, 1051-1054 (2015).
23. Bao, Z. *et al.* Homology-integrated CRISPR-Cas (HI-CRISPR) system for one-step multigene disruption in *Saccharomyces cerevisiae*. *ACS Synth. Biol.* **4**, 585-594 (2015).
24. Gilbert, L. A. *et al.* CRISPR-mediated modular RNA-guided regulation of transcription in eukaryotes. *Cell* **154**, 442-451 (2013).
25. Hou, Z. *et al.* Efficient genome engineering in human pluripotent stem cells using Cas9 from *Neisseria meningitidis*. *Proc. Natl. Acad. Sci. U. S. A.* **110**, 15644-15649 (2013).
26. Kleinstiver, B. P. *et al.* Engineered CRISPR-Cas9 nucleases with altered PAM specificities. *Nature* **523**, 481-485 (2015).
27. Zetsche, B. *et al.* Cpf1 is a single RNA-guided endonuclease of a class 2 CRISPR-Cas system. *Cell* **163**, 759-771 (2015).
28. Zalatan, J. G. *et al.* Engineering complex synthetic transcriptional programs with CRISPR RNA scaffolds. *Cell* **160**, 339-350 (2015).
29. Verwaal, R. *et al.* High-level production of beta-carotene in *Saccharomyces cerevisiae* by successive transformation with carotenogenic genes from *Xanthophyllomyces dendrorhous*. *Appl. Environ. Microbiol.* **73**, 4342-4350 (2007).
